# Supplementary material for: Impact of a multifaceted intervention to improve antibiotic prescribing: a pragmatic cluster-randomised controlled trial
Source: PubMed Central journal article supplement (PMC7722452; doi:10.1186/s13756-020-00857-9), 2020-12-07
Supplement: 13756_2020_857_MOESM2_ESM.pdf [file 13756_2020_857_MOESM2_ESM.pdf]

# Appendix 2 – Supplementary Online Course: *appearance and example of running*

USC  
UNIVERSIDADE  
DE SANTIAGO  
DE COMPOSTELA

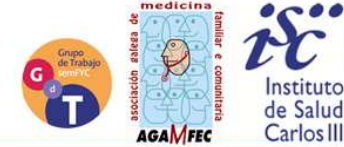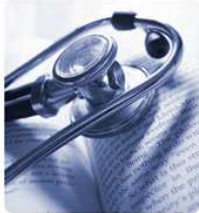

- Presentación
- Información General
- Metodología
- Casos Clínicos
- Algoritmos
- Bibliografía de apoyo
- Salir

## Infecciones respiratorias en Atención Primaria: puesta al día

### Objetivo

Actualización en el manejo de las enfermedades infecciosas respiratorias comunitarias, mediante la difusión de recomendaciones consensuadas sobre cómo utilizar los recursos diagnósticos y terapéuticos.

### Justificación

En Atención Primaria se realiza más de un 80% de la prescripción de antibióticos, en su mayor parte empleados para el tratamiento de infecciones respiratorias que generalmente están causadas por virus. A la hora de orientar el proceso infeccioso, debemos llevar a cabo una anamnesis y exploración física orientadas al caso, ayudándonos de métodos de diagnóstico rápido, si están a nuestro alcance, y decidiendo si es necesario prescribir un antibiótico para el microorganismo responsable de la infección. Si optamos por utilizar antibiótico, debemos considerar no sólo los beneficios esperados sino también los efectos no deseados, que afectan tanto al individuo como a su entorno. La selección del fármaco dependerá de si se conoce el patógeno o no; este último caso es el habitual en nuestro medio, teniendo que optar frecuentemente por emplear tratamientos empíricos, en función de otras características como la fuente de infección, las circunstancias del paciente y la epidemiología local, en el caso de que sea conocida.

El taller que se ha diseñado pretende ser de utilidad en la orientación diagnóstica y preciso en la elección del antibiótico, contribuyendo también de esta forma en la mejora de un importante problema de salud pública: las resistencias bacterianas. España es uno de los países con mayores tasas de resistencia y ésta se asocia con una mayor morbi-mortalidad, demanda sanitaria, gasto sanitario y deterioro de la eficacia del tratamiento de futuros pacientes. El consumo de antibióticos no es el único factor pero constituye un aspecto clave. Debemos prescribir menos antibióticos y utilizar aquellos con espectro más reducido.

*Basado en el Manual de enfermedades infecciosas en Atención Primaria, 3ª ed. Barcelona: semfyc ediciones, 2010*

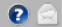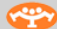

semFYC  
Sociedad Española de Medicina Familiar y Comunitaria

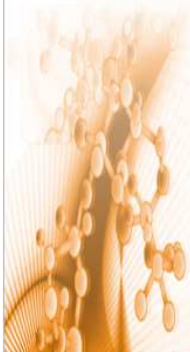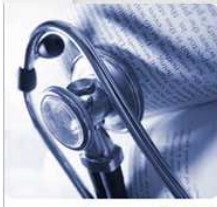

- Presentación >
- Información General >
- Autores >
- Tutores >
- Coordinación >
- Acreditación >
- Promotores >
- Metodología >
- Casos Clínicos >
- Algoritmos >
- Bibliografía de apoyo >
- Salir >

## Autores

### Jose M<sup>a</sup> Molero García

Especialista en Medicina Familiar y Comunitaria.

Coordinador del capítulo Infecciones del aparato respiratorio superior de la 3ª Edición del Manual de enfermedades infecciosas en Atención Primaria (2010).

Miembro del Grupo de Trabajo de Enfermedades Infecciosas de la semFYC. Sociedad Madrileña de Medicina Familiar y Comunitaria (SBMFIC).

Con la colaboración de **Jesús Redondo Sánchez del Grupo de enfermedades infecciosas de la SoMaMfYC.**

### Jose M<sup>a</sup> Cots Yago

Especialista en Medicina Familiar y Comunitaria.

Coordinador del capítulo Infecciones del aparato respiratorio inferior de la 3ª Edición del Manual de enfermedades infecciosas en Atención Primaria (2010).

Coordinador del Grupo de Trabajo de enfermedades infecciosas de la semFYC. Sociedad Catalana de Medicina Familiar y Comunitaria (CAMFIC).

Con la colaboración de Coro Sánchez Hernández. Grupo de Trabajo de enfermedades infecciosas de la semFYC.

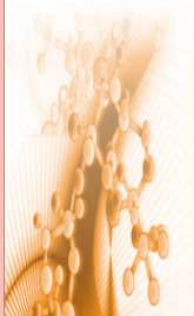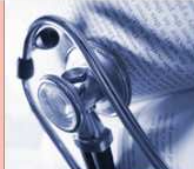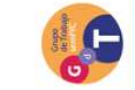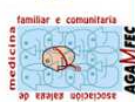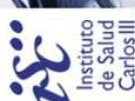

- Presentación ▲
- Información General ▲
- Autores ▲
- Tutores ▲
- Coordinación ▲
- Acreditación ▲
- Promotores ▲
- Metodología ▲
- Casos Clínicos ▲
- Algoritmos ▲
- Bibliografía de apoyo ▲
- Salir ▲

### Tutores

**Jose M<sup>o</sup> Molero Garcia.** Sociedad Madrileña de Medicina Familiar y Comunitaria (SBMFIC).  
**Jose M<sup>o</sup> Cots Yago.** Sociedad Catalana de Medicina Familiar y Comunitaria (CAMFIC).  
**M<sup>o</sup> José Monedero Mira.** Sociedad Valenciana de Medicina Familiar y Comunitaria (SYMVIC).  
**Javier Arranz Izquierdo.** Sociedad Balear de Medicina Familiar y Comunitaria (SBMFIC).  
**M<sup>o</sup> Luisa Morato Agusti.** Sociedad Catalana de Medicina Familiar y Comunitaria (CAMFIC).  
**Coro Sánchez Hernández.** Sociedad Gallega de Medicina Familiar y Comunitaria (AGAMFEC).  
 Con la colaboración como **consultor externo** de Abel Pallarés. Servicio de Neumología. Complejo Hospitalario de Pontevedra.

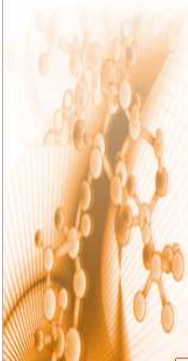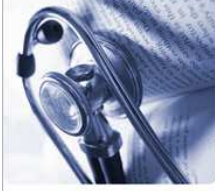

- Presentación
- Información General
- Autores
- Tutores
- Coordinación
- Acreditación
- Promotores
- Metodología
- Casos Clínicos
- Algoritmos
- Bibliografía de apoyo
- Salir

## Coordinación

**Adolfo Figueiras Guzmán.** Medicina Preventiva. Universidad de Santiago de Compostela.  
**Coro Sánchez Hernández.** Médico de Familia. Sociedad Gallega de Medicina Familiar y Comunitaria (AGAMFEC).

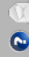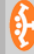

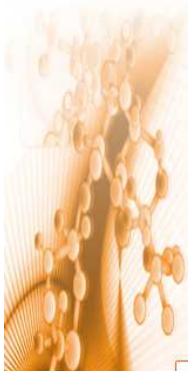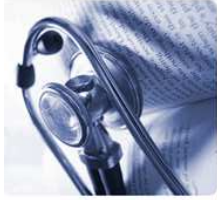

|                       |   |
|-----------------------|---|
| Presentación          | ▶ |
| Información General   | ▶ |
| Autores               | ▶ |
| Tutores               | ▶ |
| Coordinación          | ▶ |
| Acreditación          | ▶ |
| Promotores            | ▶ |
| Metodología           | ▶ |
| Casos Clínicos        | ▶ |
| Algoritmos            | ▶ |
| Bibliografía de apoyo | ▶ |
| Salir                 | ▶ |

## Acreditación

Actividad acreditada por la Comisión Autonómica de Formación Continua de la Comunidad Autónoma de Galicia con 2,3 créditos.

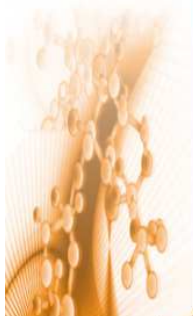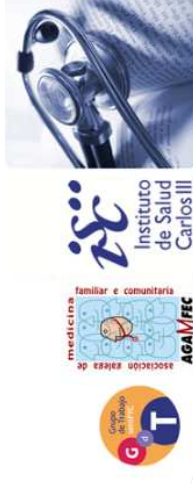

### Promotores

Curso financiado por el Instituto de Salud Carlos III, perteneciente al proyecto PI09/90609, desarrollado en la Universidad de Santiago de Compostela con la colaboración del CdT de enfermedades infecciosas de la semFYC.

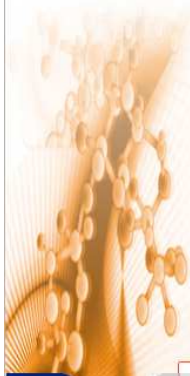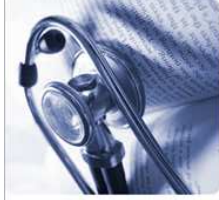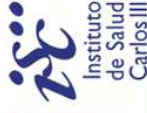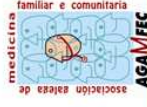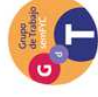

## Manual del usuario

El curso se desarrollará mediante metodología on-line a través de un campus virtual de aprendizaje desarrollado por la empresa Contactnova S. L., empresa colaboradora habitual de la Universidad de Compostela. Además del diseño se encargará de dar soporte técnico a lo largo del curso.

Se facilitará a cada alumno una clave de acceso y una dirección de correo donde podrá contactar con los tutores para formular sus dudas.

El plazo para la realización del curso completo será de 4 semanas.

**Para acceder al contenido del curso necesita introducir su dirección de e-mail a la vez que una clave autorizada por el profesorado que le remitirá a su correo electrónico.**

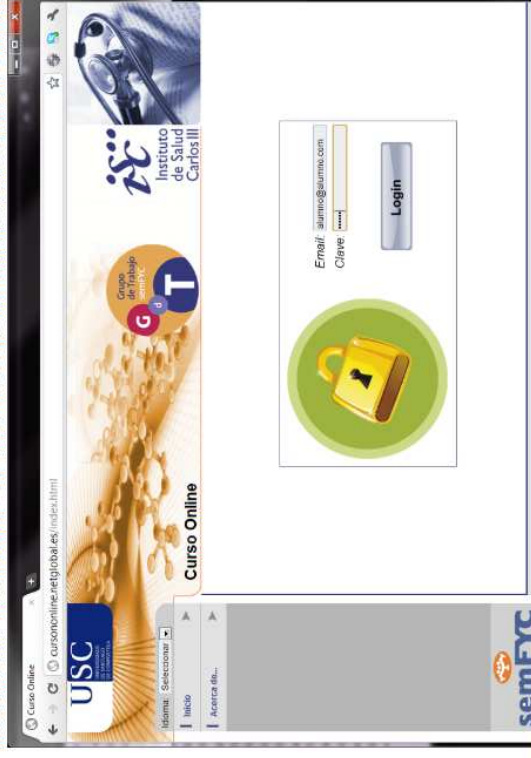

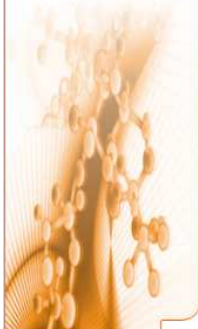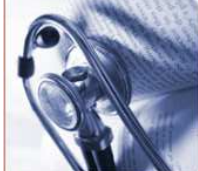

Una vez introducidos y confirmados nuestros datos correctamente, accedemos automáticamente en la aplicación del curso online sobre enfermedades infecciosas del aparato respiratorio en Atención Primaria, donde nos aparecerá la siguiente pantalla:

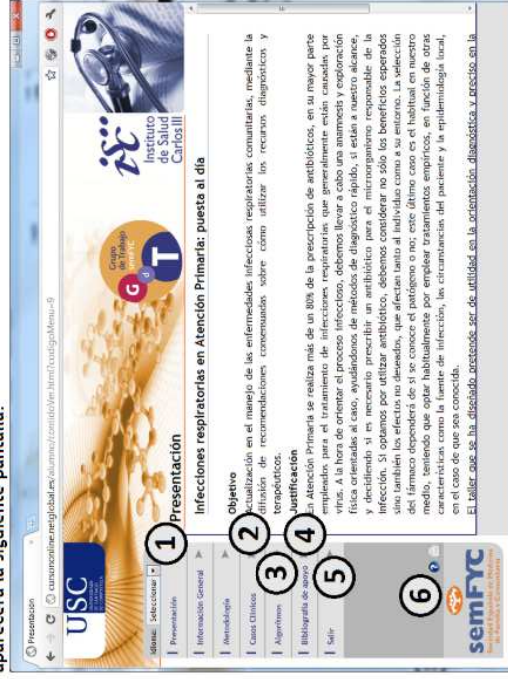

1. Menú de información general con una pequeña presentación sobre el curso, autores, tutores, coordinación, acreditación, promotores, metodología y manual de usuario.
2. Acceso a la información del curso organizado en 5 casos clínicos.
3. Acceso a los Algoritmos visuales y Algoritmos en Software que nos facilitaran el diagnóstico de las enfermedades respiratorias según el cuadro del caso clínico a evaluar. En un inicio los algoritmos están ocultos e inaccesibles hasta que los casos clínicos se vayan completando y superando con éxito.
4. Botón de acceso a Bibliografía de apoyo
5. Botón de salir de la aplicación
6. Botón de envío de mensaje a los tutores o a soporte técnico para resolver posibles dudas sobre los casos clínicos.

**Si accedemos al primer caso clínico tendremos una serie de iconos y funcionalidades nuevas:**

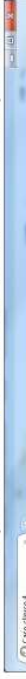



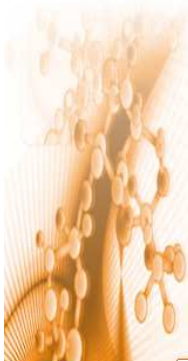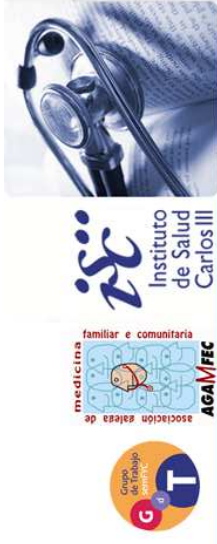

Si accedemos al primer caso clinico tendremos una serie de iconos y funcionalidades nuevas:

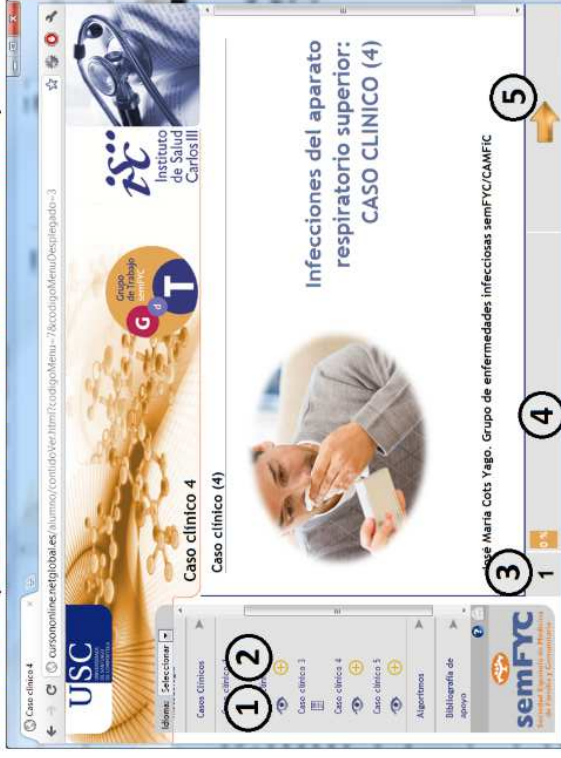

1. Este icono nos permite visualizar el caso clínico y retomarlo en la última diapositiva que se visualizó.
2. Este icono nos permite visualizar en cualquier momento del curso y en una ventana emergente de nuestro navegador los datos del caso clínico.
3. Nº de diapositiva en la que nos encontramos
4. Barra de progreso del caso clínico actual
5. Botones de navegación en el caso clínico.

A medida que avanzamos el caso clínico, la aplicación nos pondrá a prueba con una serie de preguntas.

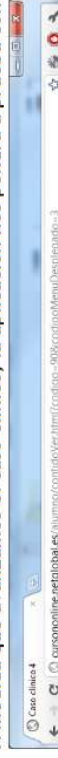

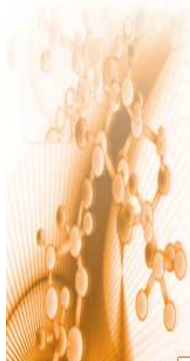

5. Botones de navegación en el caso clínico.

A medida que avanzamos el caso clínico, la aplicación nos pondrá a prueba con una serie de preguntas.

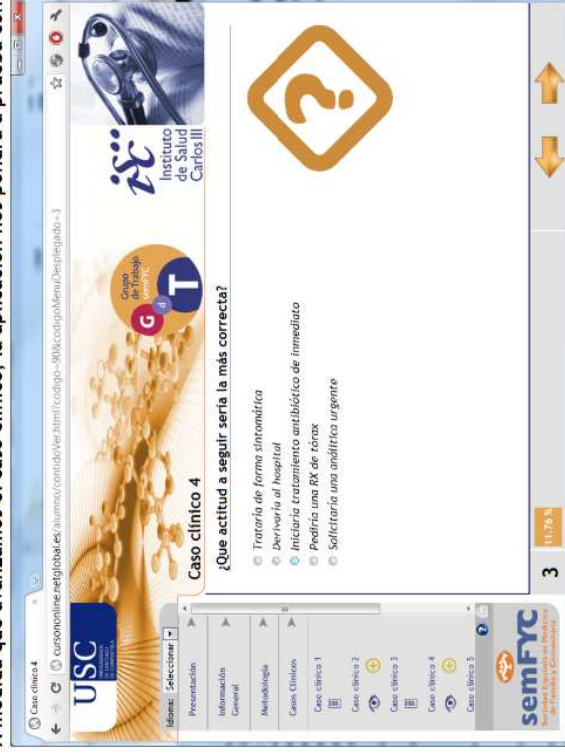

Debemos elegir la respuesta que consideremos más acertada. Al final del caso clínico y una vez adquirido los conocimientos necesarios, la aplicación nos permitirá repasar las respuestas dadas durante el transcurso del curso y podremos corregir aquellas que consideremos erróneas.

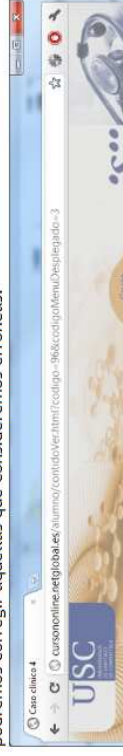

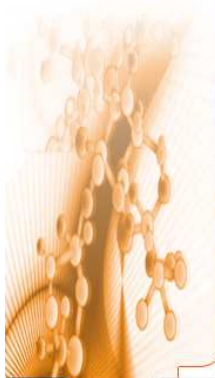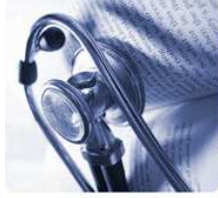
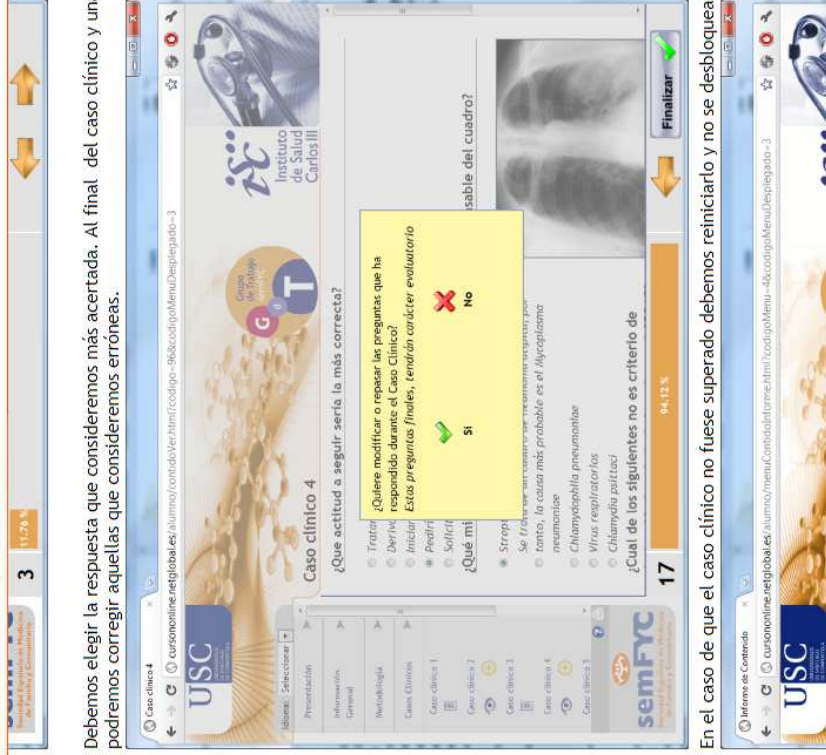

The screenshot shows the 'Caso clínico 4' interface. At the top, there are navigation arrows and a progress indicator showing '3' out of '17' cases. The main content area displays a question: '¿Que actitud a seguir sería la más correcta?' with a list of options: Tracón, Derriva, Iniciar, Pedir, Solicitar, and ¿Qué más?. A yellow tooltip is visible over the 'Iniciar' option, containing the text: '¿Quiere modificar o reparar las preguntas que ha respondido durante el Caso Clínico? Estas preguntas finales, tendrán carácter evaluatorio'. Below the question, there are radio buttons for 'SI' (selected) and 'No'. A progress bar at the bottom right shows '94.12%' and a 'Finalizar' button. The interface also includes a sidebar menu on the left and a top navigation bar with the USC logo and 'semFYC' branding.

Debemos elegir la respuesta que consideremos más acertada. Al final del caso clínico y una vez adquirido los conocimientos necesarios, la aplicación nos permitirá repasar las respuestas dadas durante el transcurso del curso y podremos corregir aquellas que consideremos erróneas.

En el caso de que el caso clínico no fuese superado debemos reiniciarlo y no se desbloqueará el algoritmo correspondiente.

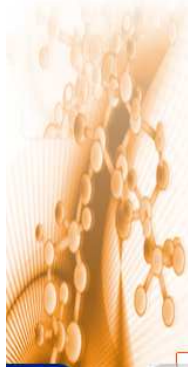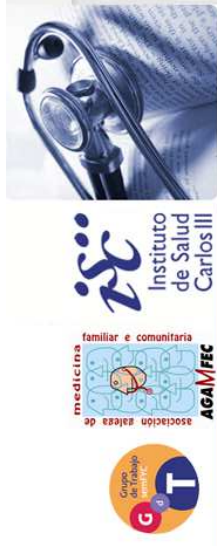

En el caso de que el caso clínico no fuese superado debemos reiniciarlo y no se desbloqueará el algoritmo correspondiente.

1. Botones para reinicializar el curso desde un principio
2. Informe del nº de aciertos sobre el total de preguntas
3. Tiempo de consulta total de las diapositivas.

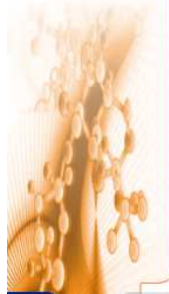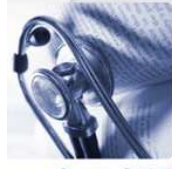

1. Botones para reinicializar el curso desde un principio
2. Informe del nº de aciertos sobre el total de preguntas
3. Tiempo de consulta total de las diapositivas.

Una vez superado el caso clínico se mostrará la siguiente pantalla que detallamos a continuación:

| Caso           | Respuesta Pregunta | Respuesta Definitiva | Respuesta Verdadera |
|----------------|--------------------|----------------------|---------------------|
| Caso clínico 1 | Correcto           | Correcto             | Correcto            |
| Caso clínico 2 | Incorrecto         | Incorrecto           | Incorrecto          |
| Caso clínico 3 | Correcto           | Correcto             | Correcto            |
| Caso clínico 4 | Incorrecto         | Incorrecto           | Incorrecto          |
| Caso clínico 5 | Correcto           | Correcto             | Correcto            |

¿Cuál es el diagnóstico más probable?

¿Realizará alguna prueba complementaria para establecer el diagnóstico definitivo?

¿Cuál sería la etiología más probable de la infección que presenta este paciente?

¿Iniciaría tratamiento antibiótico?

1. Botón para visualizar el informe del caso clínico
2. Informe del caso clínico con las respuestas correctas e incorrectas contestadas durante la realización del curso y finalmente la respuesta definitiva dada. Si una pregunta fue contestada incorrectamente en el test final, la respuesta verdadera aparecerá en una 4ª columna.
3. Como el caso clínico fue superado con éxito, queda accesible el algoritmo correspondiente. Así con el siguiente botón podremos visualizar el algoritmo que nos ayudará en nuestro diagnóstico.
4. Con este botón accedemos al algoritmo por software, que nos irá realizando una serie de preguntas y finalmente nos aconsejará en nuestra toma de decisión a la hora de diagnosticar.

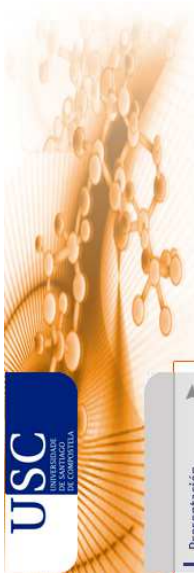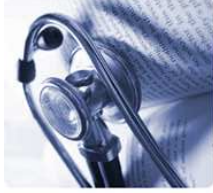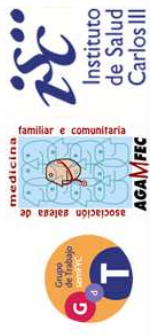

### Sistema de Evaluación

El curso está dividido en 5 casos clínicos que servirán de introducción a los conceptos teóricos. Se realizará una prueba de evaluación al final con preguntas tipo test, en la que el alumno tendrá la oportunidad de valorar su evolución contrastando sus propias respuestas antes y después de realizar los casos.

#### Requerimientos exigidos para la acreditación

Haber superado en la prueba de evaluación final el 50 % de aciertos.

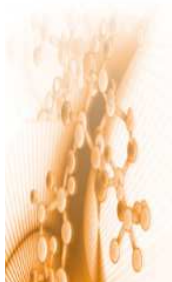

### Manejo de la rinosinusitis bacteriana aguda

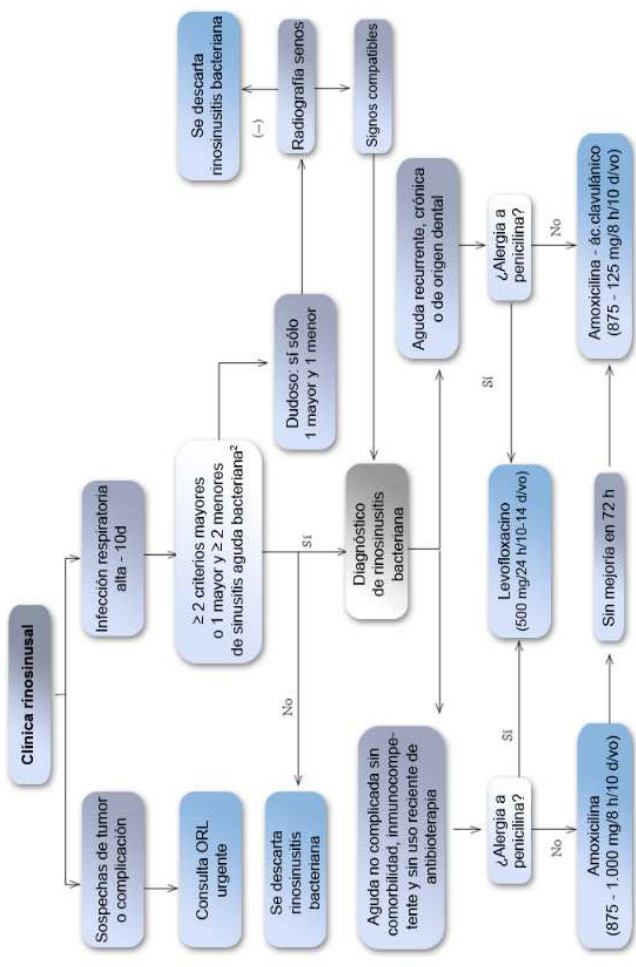

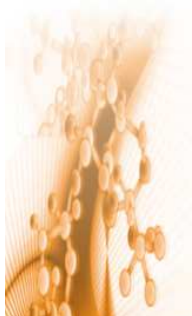

### Algoritmo diagnóstico en faringitis

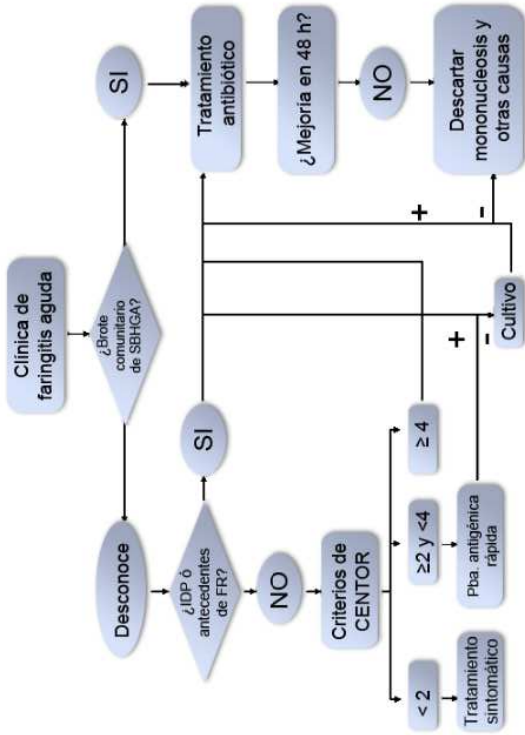

SBHGAY: streptococcus beta hemolítico grupo a  
FR: fiebre reumática  
IDP: inmunodepresión



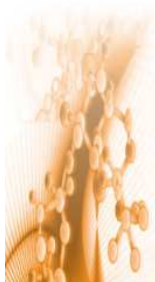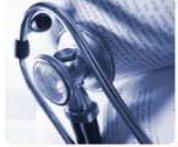

**Algoritmo de actuación ante una bronquitis aguda**

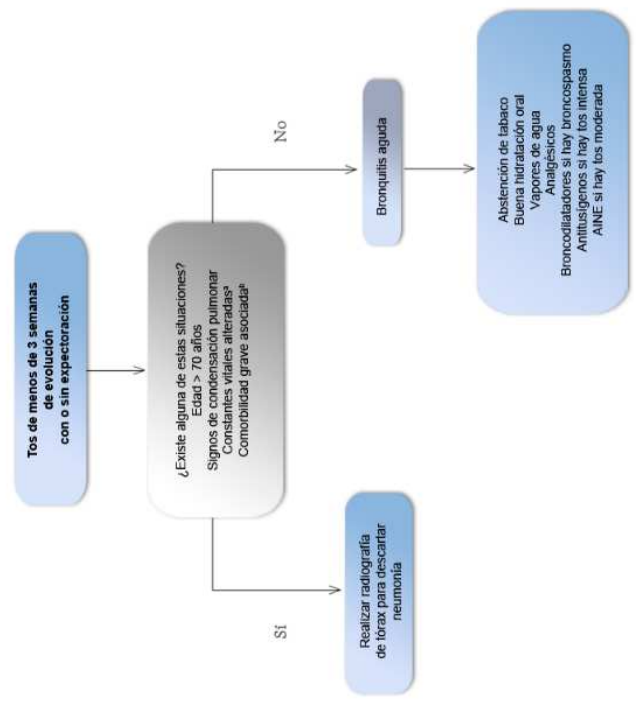

a. Temperatura axilar > 39 °C; frecuencia respiratoria >24/min, o bien frecuencia cardíaca >100/min.  
 b. Accidente cerebrovascular; EPOC; insuficiencia renal, cirrosis, inmunodepresión, neoplasia, o bien insuficiencia cardíaca  
 AINE: antiinflamatorios no esteroideos; EPOC: enfermedad pulmonar obstructiva crónica.

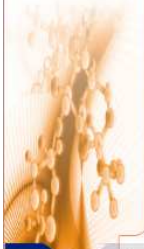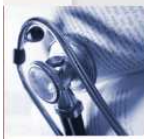

### Algoritmo de abordaje de paciente con probable neumonía

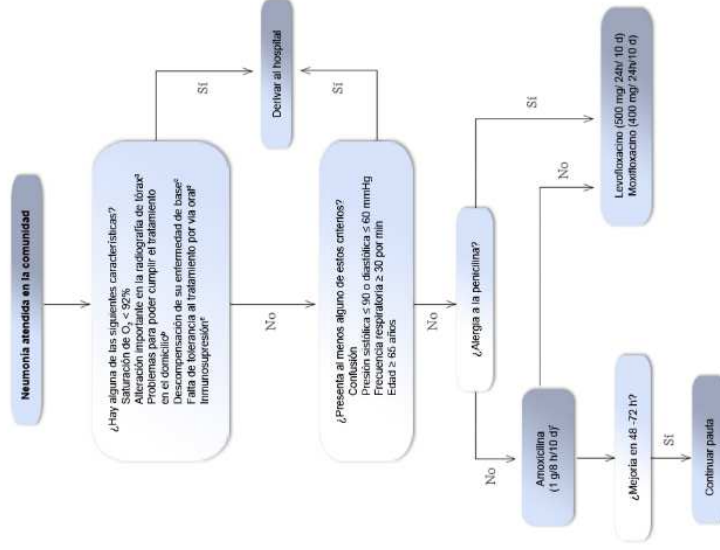

\* Hay que disponer de una radiografía de tórax para confirmar el diagnóstico y evaluar la gravedad de la enfermedad cuando se presenta cualquiera de las siguientes alteraciones: infiltrado alveolar en más de un lóbulo o lóbulo, derrame pleural o cavitación pulmonar.  
 † Asociada a problemas preexistentes, adicción a drogas y alcohol o un entorno familiar no adecuado.  
 \* Hay que prestar especial atención a la presencia de insuficiencia renal, cirrosis hepática, insuficiencia cardíaca, enfermedad pulmonar obstructiva crónica, accidente cerebrovascular y diabetes mellitus.  
 † Infección crónica por virus de la inmunodeficiencia adquirida, trasplantados, inmunosupresores o pacientes que reciben tratamiento inmunosupresor.  
 † En pacientes mayores de 65 años, debería utilizarse la asociación de amoxicilina y ácido clavulánico (2.000 / 125 mg/ 10 d) para cubrir *Streptococcus pneumoniae*.

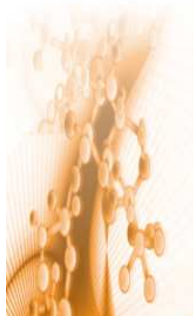

### Algoritmo de actuación ante una agudización en un paciente EPOC

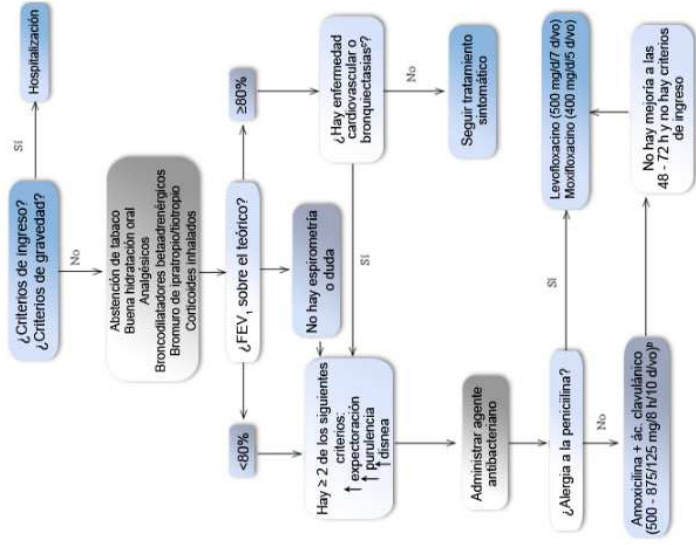

<sup>a</sup>Obnubilación, taquigneu (>35rpm), insuficiencia respiratoria, cor pulmonale, sarcopenia. Cuando hay comorbilidad asociada (cirrosis hepática, insuficiencia hepática, diabetes insulino-dependiente, insuficiencia cardíaca, cardiopatía isquémica), puede instaurarse tratamiento de forma ambulatoria y controlar estrictamente el paciente.

<sup>b</sup>En caso de intolerancia al ácido clavulánico puede utilizarse una cefalosporina.

<sup>c</sup>Algunos autores consideran también la edad avanzada (mayores de 65 años) y los pacientes con cuatro o más agudizaciones al año.

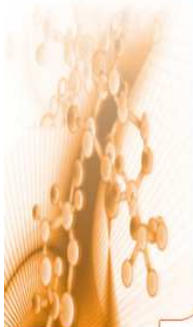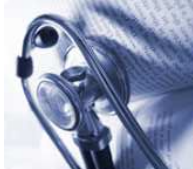

### Bibliografía de infecciones respiratorias altas

- Tomás M, Ortega P, Mensa J, García JA, Barberán J. Diagnóstico y tratamiento de las rinosinusitis agudas. Segundo consenso. Rev Esp Quimioter 2008;21(1):45-59
- Arroll B, Kenealy T. Antibióticos para el resfriado común y la rinitis purulenta aguda (Revisión Cochrane traducida). En: La Biblioteca Cochrane Plus, número 3, 2008. Oxford, Update Software Ltd. Disponible en: <http://www.update-software.com>. (Traducida de The Cochrane Library, Issue . Chichester, UK: John Wiley & Sons, Ltd.)
- Young J, De Sutter A, Merenstein D, van Essen GA, Kaiser L, Varonen H, Williamson I, Bucher HC. Antibiotics for adults with clinically diagnosed acute rhinosinusitis: a meta-analysis of individual patient data. Lancet. 2008; 371(9616):908-14.
- Falagas ME, Giannopoulos KP, Vardakakis KZ, Dimopoulos G, Karageorgopoulos DE. Comparison of antibiotics with placebo for treatment of acute sinusitis: a meta-analysis of randomised controlled trials. Lancet Infect Dis. 2008; 8(9):543-52
- Tomás M, Ortega P, Mensa J, García JA, Barberán J. Diagnóstico y tratamiento de las rinosinusitis agudas. Segundo consenso. Rev Esp Quimioter 2008;21(1):45-59
- Fokkens WJ, Lund VJ, Mullol J. European Position Paper on Rhinosinusitis and Nasal Polyps 2007. Rhinology 2007; 45(Suppl. 20):1 -139.
- Rosenfeld RM, Singer M, Jones S. Systematic review of antimicrobial therapy in patients with acute rhinosinusitis. Otolaryngol Head Neck Surg. 2007; 137(3 Suppl):S32-45.
- Del Mar CB, Glasziou PP, Spinks AB. Antibióticos para la faringitis (Revisión Cochrane traducida). En: La Biblioteca Cochrane Plus, 2005 Número 2. Oxford: Update Software Ltd. Disponible at: <http://www.update-software.com>. (Traducida de The Cochrane Library, 2005 Issue 2, Chichester, UK: John Wiley & Sons, Ltd.)
- Maltezzou HC, Tsagris V, Antoniadou A, Galani L, Douras C, Katsarolis I, et al. Evaluation of a rapid antigen detection test in the diagnosis of streptococcal pharyngitis in children and its impact on antibiotic prescription. J Antimicrob Chemother. 2008.
- Centor R, Witherspoon J, Dalton H, Brody C, Link K. The diagnosis of strep throat in adults in the emergency room. Med Decis Mak. 1981;1(3):239-46.1
- Snow V, Mottur-Pilson C, Cooper RJ, Hoffman JR, American College of Physicians-American Society of Internal Medicine: Centers for Disease Control. Principles of appropriate antibiotic use for acute pharyngitis in adults. Ann Intern Med. 2001 Mar 20;134(6):506-8.

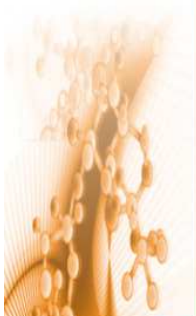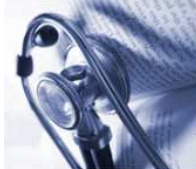

### Bibliografía de infecciones respiratorias bajas

- Snucny JJ, Becker LA, Glazier RH, McIsaac W. Are antibiotics effective treatment for acute bronchitis? *J Fam Pract* 1998;47:453-60.
- Coenen S, Van Royen P, Vermeire E, Hermans J, Deneekens J, Timmermans J, Hooton TM, et al. Placebo found equivalent to amoxicillin for treatment of acute bronchitis in Nairobi, Kenya: a triple blind, randomized, equivalence trial. *Thorax* 2008;63:999-1005.
- Nduba VN, Mwachari CW, Magaret AS, Park DR, Kigo A, Hooton TM, et al. Placebo found equivalent to amoxicillin for treatment of acute bronchitis in Nairobi, Kenya: a triple blind, randomized, equivalence trial. *Thorax* 2008;63:999-1005.
- Stott NC, West RR. Randomised controlled trial of antibiotics in patients with cough and purulent sputum. *Br Med J* 1976;2:556-9.
- Bent B, Saint S, Vittinghoff E, Grady D. Antibiotics in acute bronchitis: a meta-analysis. *Am J Med* 1999;107:62-7.
- Petersen I, Johnson AM, Islam A, Duckworth G, Livermore DM, Hayward AC. Protective effect of antibiotics against serious complications of common respiratory tract infections: retrospective cohort study with the UK General Practice Research Database. *BMJ* 2007;335:982.
- Spurling GK, Del Mar CB, Dooley L, Foxlee R. Delayed antibiotics for respiratory infections. *Cochrane Database Syst Rev* 2007;(3):CD0004417.
- Snucny JJ, Fahey T, Becker L, Glazier R. Antibiotics for acute bronchitis. *Cochrane Database Syst Rev* 2004;(4):CD000245.
- Anthonisen NR, Manfreda J, Warren CPW, Hershfield ES, Harding GM, Nelson NA. Antibiotic therapy in exacerbations of chronic obstructive pulmonary disease. *Ann Intern Med* 1987;106:196-204.
- Stockley RA, O'Brien C, Pye A, Hill SL. Relationship of sputum color to nature and outpatient management of acute exacerbations of COPD. *Chest* 2000;117:1638-45.
- Ball P. Epidemiology and treatment of chronic bronchitis and its exacerbations. *Chest* 1995;108:435-525.
- Saint S, Bent S, Vittinghoff E, Grady D. Antibiotics in chronic obstructive pulmonary disease exacerbations: a meta-analysis. *JAMA* 1995;273:957-60.
- Ram FS, Rodriguez-Roisin R, Granados-Navarrete A, Garcia-Aymerich J, Barnes NC. Antibiotics for exacerbations of chronic obstructive pulmonary disease. *Cochrane Database Syst Rev* 2006;(2):CD004403.
- Miravittles M, Monsó E, Mensa J, Aguarón J, Barberán J, Barceña M, et al. Antimicrobial Treatment of Exacerbation in Chronic Obstructive Pulmonary Disease: 2007 Consensus Statement. *Arch Bronconeumol* 2008;44:100-8.
- Puhon MA, Volleweider D, Latschang T, Steurer J, Steurer-Stey C. Exacerbations of chronic obstructive pulmonary disease: when are antibiotics indicated? A systematic review. *Respir Res* 2007;8:30.
- Rohde G, Wiethege A, Borg J, Kauth M, Bauer TT, Gillissen A, et al. Respiratory viruses in exacerbations of chronic obstructive pulmonary disease requiring hospitalisation: a case-control study. *Thorax* 2003;58:37-42.
- Lieberman D, Shmarkov O, Gelfer Y, Varsavsky R, Lieberman DV. Prevalence and clinical significance of fever in acute exacerbations of chronic obstructive pulmonary disease. *Eur J Clin Microbiol Infect Dis* 2003;22:75-8.
- Fine MJ, Auble TE, Yealy DM, Hanusa BH, Weissfeld LA, Singer DE, et al. A prediction rule to identify low-risk patients with community-acquired pneumonia. *N Engl J Med* 1997;336:243-50.
- Metlay JP, Fine MJ. Testing strategies in the initial management of patients with community-acquired pneumonia. *Ann Intern Med* 2003;138:109-18.
- Schuetz P, Koller M, Christ-Crain M, Steyerberg E, Stolz D, Müller C, et al. Predicting mortality with pneumonia severity scores: importance of model recalibration to local settings. *Epidemiol Infect* 2008;27:1-10.
- Lim WS, Van der Erden MM, Boersma WG, Karalus N, Town GI, Lewis SA, et al. Defining community-acquired pneumonia severity on presentation to hospital: an international derivation and validation study. *Thorax* 2003;58:337-82.
- Santos C, Llorente MA, Carandell E, Gutiérrez M, Riera M, Ramirez A et al. Lugar de atención, etiología y tratamiento de las neumonías adquiridas en la comunidad de Palma de Mallorca. *Med Clin (Barc)* 1998;110:290-4.
- Mandell LA, Wunderink RG, Anzueto A, Bartlett JG, Campbell GD, Dean NC, et al. Infectious Diseases Society of America/American Thoracic Society consensus guidelines on the management of community-acquired pneumonia in adults. *Clin Infect Dis* 2007;44(Suppl 2):S27-72.
- Lim WS. Severity assessment in community-acquired pneumonia: moving on. *Thorax* 2007;62:287-8.
- Almirall J, Bolibar I, Torán P, Pera G, Boquet X, Balanzó X, Saucá G. Community-acquired pneumonia Maresme Study Group. Contribution of C-reactive protein to the diagnosis and assessment of severity of community-acquired pneumonia. *Chest* 2004;125:1335-42.
- Mills GD, Oehley MR, Arrol B. Effectiveness of beta-lactam antibiotics compared with antibiotics active against atypical pathogens in non-severe community acquired pneumonia: meta-analysis. *BMJ* 2005;330:456.
- Holm A, Nexoe J, Bistrup LA, Pedersen SS, Obel N, Nielsen LP, Petersen C. Aetiology and prediction of pneumonia in lower respiratory tract infection in primary care. *Br J Gen Pract* 2007;57:547-54.
- Falk G, Fahey T. C-reactive protein and community-acquired pneumonia in ambulatory care: systematic review of diagnostic accuracy studies. *Fam Pract* 2009;26:10-21.

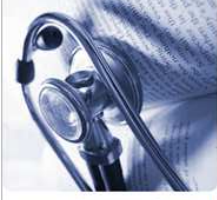

- Presentación
- Información General
- Metodología
- Casos Clínicos
  - Caso clínico 1
  - Caso clínico 2
  - Caso clínico 3
  - Caso clínico 4
  - Caso clínico 5
- Algoritmos
- Bibliografía de apoyo
- Salir

### Caso clínico (1)

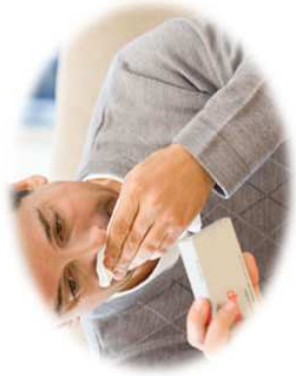

## Infecciones del aparato respiratorio superior: CASO CLINICO (1)

José María Molero García. Grupo de enfermedades infecciosas semFYC/SoMaMFyC  
Con la colaboración de Jesús Redondo Sánchez. Grupo de enfermedades infecciosas SoMaMFyC

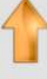

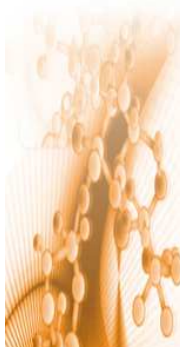

## Caso clínico 1

### Caso clínico (1)

## Varón de 35 años.

#### Antecedentes:

- Amigdalotomizado (hace 7 años). Fumador 10 cigarrillos/día (15 paquetes-año).
- Resfriados frecuentes en invierno (4 episodios /año).
- Intervenido de pólipos nasal hace 2 años.

#### Enfermedad actual:

- Cuadro de "catarro nasal" que arrastra desde hace **10 días** que no ha mejorado, incluso refiere encontrarse peor que en los primeros días.
- **Rinorrea amarillenta-verdosa en últimos 3 días** con obstrucción nasal.
- **Fiebre (38,5° C)** en las últimas 36 horas.
- **Cefalea frontal y en hemicara derecha** moderada que se controla parcialmente con analgesia.
- Tos seca irritativa desde el comienzo del cuadro, sin disnea.

#### Exploración:

- Afectación del estado general, Tª :38,6°C.
- FC: 72 lpm; FR: 17 rpm; Saturación O2: 95%.
- Mucosa nasal congestionada, hiperémica.
- Secreción muco-purulenta en cavum.
- Otoscopia normal.
- Dolor a la presión maxilar derecho.

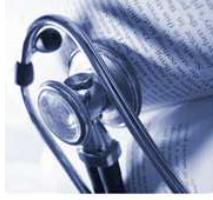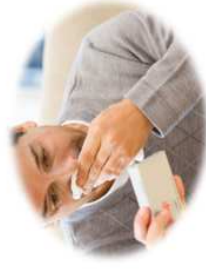

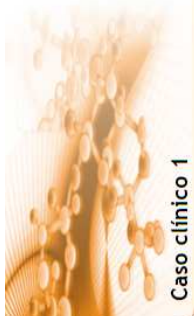

### Caso clínico 1

¿Cuál es el diagnóstico más probable?

- Rinitis aguda.
- Bronquitis aguda
- Rinosinusitis aguda bacteriana.
- Traqueítis.
- Los datos clínicos son inespecíficos y no permiten orientar un diagnóstico sindrómico.

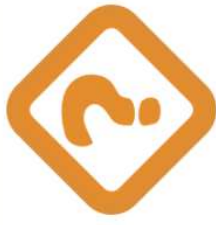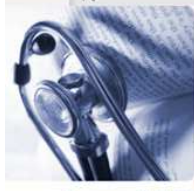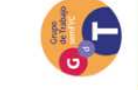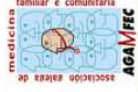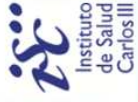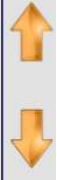



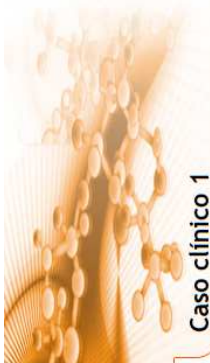

## Caso clínico 1

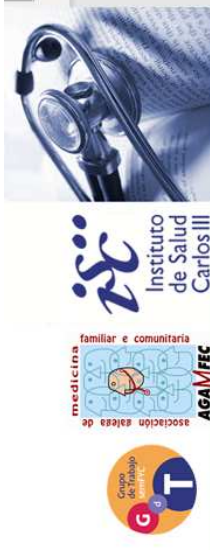

- Presentación ▲
- Información General ▲
- Metodología ▲
- Casos Clínicos ▲
  - Caso clínico 1 ▲ (+)
  - Caso clínico 2 ▲ (+)
  - Caso clínico 3 ▲ (+)
  - Caso clínico 4 ▲ (+)
  - Caso clínico 5 ▲ (+)
- Algoritmos ▲
- Bibliografía de apoyo ▲
- Salir ▲

### Rinosinusitis bacteriana aguda

- Inflamación de la mucosa o del hueso subyacente de las paredes de uno o más de los senos paranasales y fosas (rinosinusitis) o simplemente la presencia de derrame en su interior.
- Se inicia en el contexto de una inflamación de la mucosa nasofaríngea, habitualmente de origen viral, que cierra los conductos de drenaje. De **0,5 a 2% de las rinitis infecciosas agudas** se complican con una rinosinusitis bacteriana:
  - o Adultos: maxilar, etmoidal, frontal (desarrollo entre 4-8 años) y esfenoidal (presente a partir de 5 años).
  - o Niños: etmoidal.
- El diagnóstico de rinosinusitis aguda bacteriana se basa en la **historia y examen físico**.
- No hay ningún síntoma o signo suficientemente específico para identificar el proceso como bacteriano. Es frecuente el error diagnóstico y el sobret ratamiento con antibióticos.

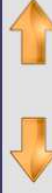

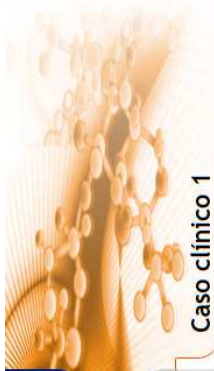

## Caso clínico 1

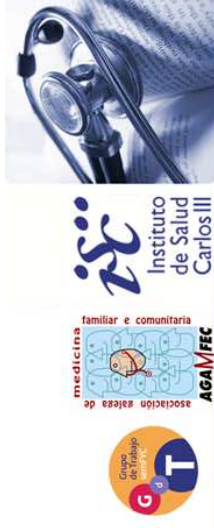

- Presentación
- Información General
- Metodología
- Casos Clínicos
  - Caso clínico 1
  - Caso clínico 2
  - Caso clínico 3
  - Caso clínico 4
  - Caso clínico 5
- Algoritmos
- Bibliografía de apoyo
- Salir

### Sinusitis. Factores favorecedores

- Alteraciones en la permeabilidad de los ostium o canales de drenaje (rinitis virales, atopia/alergia, hipertrofia de cornetes, poliposis nasal, tumores, etc).
- Disfunción del transporte mucociliar (frío, sequedad ambiental, síndrome del cilio inmóvil).
- Factores tóxicos, ambientales e irritativos relacionados: tabaquismo, polución, polvo, cocaína, natación, uso inapropiado de tratamientos tópicos nasales, barotraumatismo, hiperproducción de moco.
- Enfermedades sistémicas: Diabetes mellitus, inmunosupresión, linfoma, leucemia, autoinmunes o fibrosis quística.
- Procesos dentarios (10% de las sinusitis maxilares).

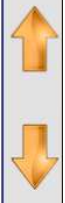

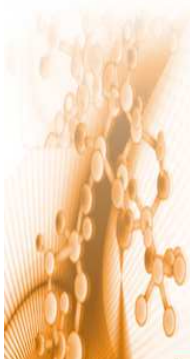

Caso clínico 1

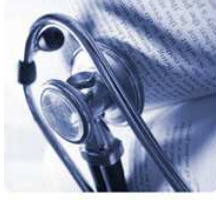

Diagnóstico clínico probable de rinosinusitis aguda bacteriana

Criterios mayores

1. Secreción nasal purulenta anterior/posterior
2. Tos

Criterios Menores

1. Cefalea
2. Dolor facial
3. Edema periorbitario
4. Fiebre
5. Dolor dental
6. Otaglia
7. Odinofagia
8. Halitosis

Diagnóstico probable:

Puntuación  $\geq$  2 criterios mayores ó 1 mayor y  $\geq$  2 menores

Manual semFYC de enfermedades infecciosas. 2010  
Rev Esp Quimioter 2008;21(1):45-59

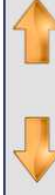

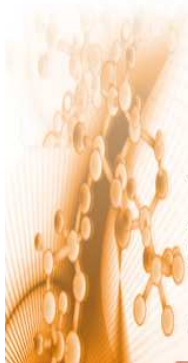

Caso clínico 1

- Presentación
- Información General
- Metodología
- Casos Clínicos
  - Caso clínico 1
  - Caso clínico 2
  - Caso clínico 3
  - Caso clínico 4
  - Caso clínico 5
- Algoritmos
- Bibliografía de apoyo
- Salir

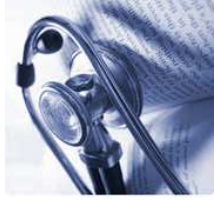

Sinusitis: síntomas y signos asociados

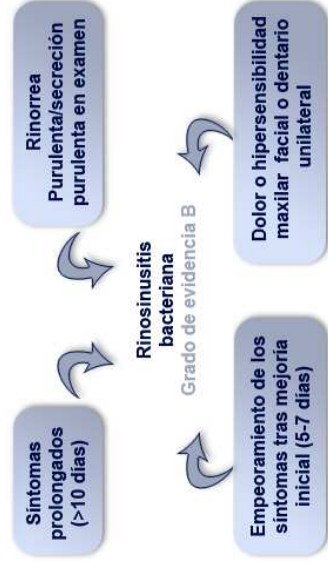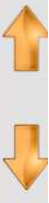

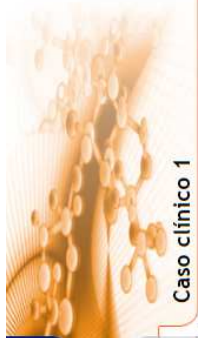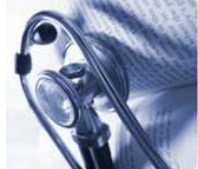

- Presentación
- Información General
- Metodología
- Casos Clínicos
  - Caso clínico 1
  - Caso clínico 2
  - Caso clínico 3
  - Caso clínico 4
  - Caso clínico 5
- Algoritmos
- Bibliografía de apoyo
- Salir

### Caso clínico 1

¿Realizaría alguna prueba complementaria para establecer el diagnóstico sindrómico?

- Determinación de la proteína C reactiva (PCR)
- Una radiología simple de senos paranasales en proyección de Waters
- Una radiología simple de senos paranasales en proyección de Caldwell
- No es rentable realizar pruebas adicionales en este caso por tratarse de un cuadro no grave
- Cultivo de moco nasal

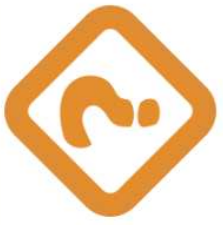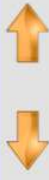

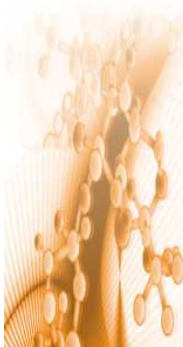

## Caso clínico 1

- Presentación ▲
- Información General ▲
- Metodología ▲
- Casos Clínicos ▲
  - Caso clínico 1 ▲ (+)
  - Caso clínico 2 ▲ (+)
  - Caso clínico 3 ▲ (+)
  - Caso clínico 4 ▲ (+)
  - Caso clínico 5 ▲ (+)
- Algoritmos ▲
- Bibliografía de apoyo ▲
- Salir ▲

### Rinosinusitis bacteriana aguda. Pruebas complementarias de laboratorio

- **Reservadas para casos graves**
- **Cultivo de moco nasal:**
  - Se relaciona en menos del 30%-40% de los casos con el agente causal.
  - No se correlaciona con el cultivo de moco de los senos paranasales.
- **Cultivo del exudado por punción y aspiración del seno:**
  - Patrón oro para el diagnóstico.
  - Técnica muy invasiva, no se realiza rutinariamente.
  - Se considera significativo de infección de aislamiento de  $\geq 10^4$  ufc/ml en el aspirado.

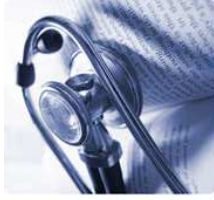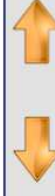

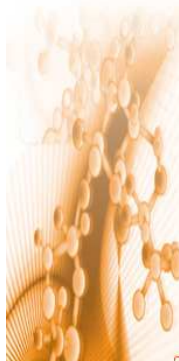

## Caso clínico 1

### Proteína C reactiva en la sinusitis aguda

#### Predicción de etiología bacteriana según punto de corte

| Punto de corte | Sensibilidad | Especificidad |
|----------------|--------------|---------------|
| 10 mg/L        | 82%          | 55%           |
| 25 mg/L        | 52%          | 78%           |

  

| Sinusitis    | Resultado    |
|--------------|--------------|
| < 10 mg/L    | → viral      |
| 10 - 40 mg/L | → duda       |
| > 40 mg/L    | → bacteriano |

Un valor de PCR < 10 mg/L en la sinusitis descarta la etiología bacteriana y 1 > 40 mg/L orienta hacia esa etiología.

Hansen JG et al. BMJ 1995;311:233-6

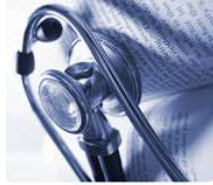

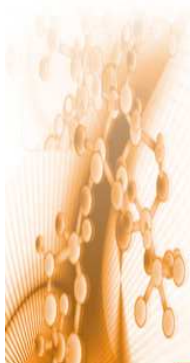

## Caso clínico 1

- Presentación
- Información General
- Metodología
- Casos Clínicos
  - Caso clínico 1
  - Caso clínico 2
  - Caso clínico 3
  - Caso clínico 4
  - Caso clínico 5
- Algoritmos
- Bibliografía de apoyo
- Salir

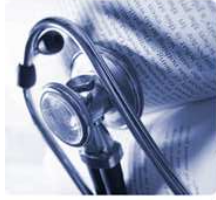

### Rinosinusitis bacteriana. Pruebas de Imagen

- **Radiología simple:**
  - Menor sensibilidad y especificidad que la clínica: sólo un 60% de las sinusitis presentan éstos signos radiológicos.
  - No permite distinguir entre etiología viral y bacteriana.
  - Diferencias interobservador muy grandes y en menores de 3 años no es útil.
  - Proyección de Waters (occipitomentoniana): visualiza mejor el seno maxilar.
  - Proyección de Caldwell (anteroposterior): visualiza mejor el seno frontal.
- **TC y RNM:** no se deben utilizar rutinariamente para el diagnóstico de sinusitis, reservándose para complicaciones, procesos crónicos y diagnósticos poco claros.
- **Estarian indicadas en:**
  1. Sintomatología prolongada o sin respuesta en 3-4 semanas.
  2. Sinusitis clínica de repetición (> 3 veces al año).
  3. Enfermedad sinusal con complicaciones orbitarias o del SNC

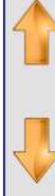



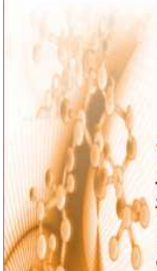

### Caso clínico 1

- Presentación
- Información General
- Metodología
- Casos Clínicos
  - Caso clínico 1
  - Caso clínico 2
  - Caso clínico 3
  - Caso clínico 4
  - Caso clínico 5
- Algoritmos
- Bibliografía de apoyo
- Salir

¿Cuál sería la etiología más probable de la infección que presenta este paciente?

- Haemophilus influenzae*
- Moraxella catarrhalis*
- Streptococcus pneumoniae*
- Mycoplasma pneumoniae*
- Rhinovirus*

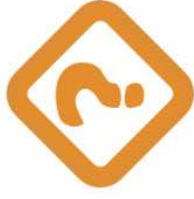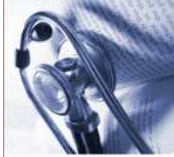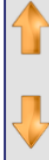

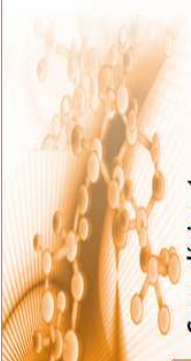

### Caso clínico 1

#### Sinusitis. Etiología rinosinusitis aguda

| Microorganismo                                    | Adultos | Niños  |
|---------------------------------------------------|---------|--------|
| <b>Bacterias</b>                                  |         |        |
| <i>Streptococcus pneumoniae</i>                   | 20-43%  | 35-42% |
| <i>Haemophilus influenzae</i>                     | 6-35%   | 21-28% |
| <i>Anaerobios (dentario)</i>                      | 0-10%   | 3-7%   |
| <i>Staphylococcus aureus (FQ)</i>                 | 0-8%    | -      |
| <i>Streptococcus pyogenes</i>                     | 1-3%    | 3-7%   |
| <i>Moraxella catarrhalis</i>                      | 2-10%   | 21-28% |
| <b>Virus: Rinovirus, Influenza, Parainfluenza</b> | 3-15%   | -      |
| <b>Hongos (IDP): Aspergillus</b>                  | Baja    | -      |

La sinusitis aguda es generalmente monomicrobiana, mientras que la crónica suele ser polimicrobiana. Infección mixta: 25% (combinación *S. pneumoniae* + *H. influenzae*). La mayoría de las rinosinusitis agudas diagnosticadas en AP son de origen vírico (50%).

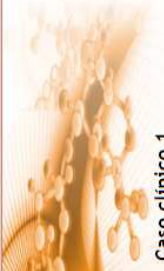

### Caso clínico 1

¿Iniciaría tratamiento antibiótico?

- Sí
- No

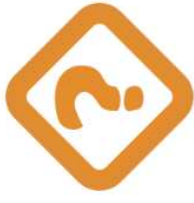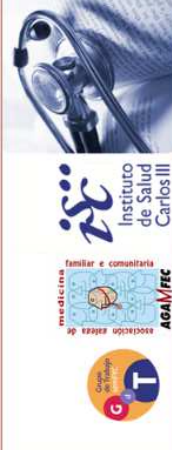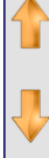

## Caso clínico 1

### En relación con el antibiótico de la rinosinusitis bacteriana aguda, ¿es falso?

- Las ventajas del tratamiento antibiótico son en general moderadas
- Los antibióticos logran un cambio importante en la tasa de recidivas, pero no en las recurrencias ni el paso a la cronicidad
- No existe evidencia que el tratamiento antibiótico inicial disminuya la frecuencia de complicaciones
- Los antibióticos están indicados si existe una elevada sospecha de origen dentario
- La antibioterapia no está indicada en las formas de sinusitis maxilar aguda leve-moderada

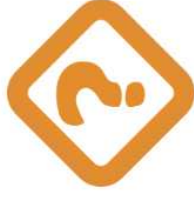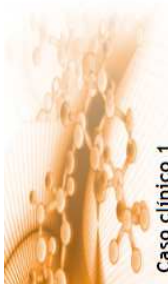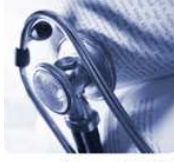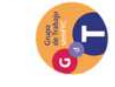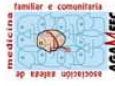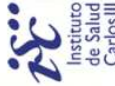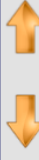

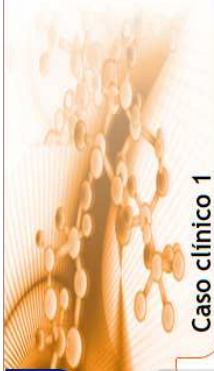

## Caso clínico 1

- Presentación
- Información General
- Metodología
- Casos Clínicos
  - Caso clínico 1
  - Caso clínico 2
  - Caso clínico 3
  - Caso clínico 4
  - Caso clínico 5
- Algoritmos
- Bibliografía de apoyo
- Salir

### Antibióticos en sinusitis bacteriana

- Ventajas moderadas (NNT para la curación de 14 días).
- Los síntomas se resuelven en las dos primeras semanas en el 70-80% de lo no tratados y en 85% de los tratados.
- 15% de los pacientes presentan síntomas de rinosinusitis durante más de dos semanas, con o sin tratamiento antibiótico.
- La incidencia de complicaciones graves y la progresión a cronicidad es extremadamente baja.
- Los antibióticos no han demostrado disminuir el riesgo de complicaciones, recidivas o progresión a la cronicidad.

Young J. *Lancet*. 2008 ;371(9616):908-1  
 Ah-See K. *Sinusitis (acute)*. *Clin Evid (Online)*. 2008  
 Ahovuo-Saloranta A. *Cochrane Database of Systematic Reviews* 2009, Issue 2

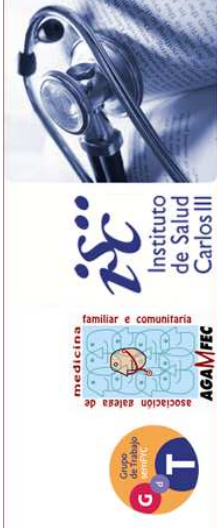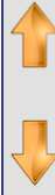

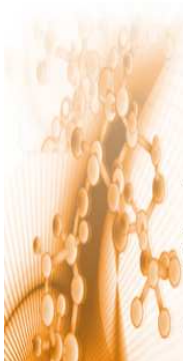

## Caso clínico 1

- Presentación
- Información General
- Metodología
- Casos Clínicos
  - Caso clínico 1
  - Caso clínico 2
  - Caso clínico 3
  - Caso clínico 4
  - Caso clínico 5
- Algoritmos
- Bibliografía de apoyo
- Salir

### Rinosinusitis bacteriana. Indicaciones de tratamiento

- **Tratamiento antibiótico si:**
  - Clínica ( $\geq 7 - 10$  días) con síntomas de moderados a graves ( $T^{\circ} > 38,3^{\circ}C$ , dolor severo) que reúnan al menos dos o más criterios de etiología bacteriana.
  - Empeoramiento clínico progresivo.
- **Seguimiento/observación en las formas aguda leve-moderada**

Rosenfeld RM. *Otolaryngol Head Neck Surg.* 2007 ;137(3 Suppl):S1-31  
*Rev Esp Quimioter.* 2008;21(1):45-59

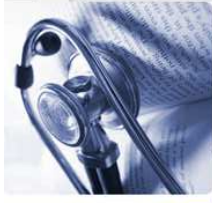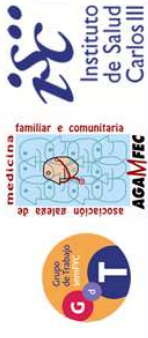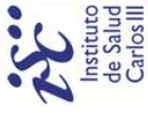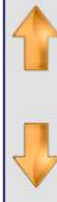

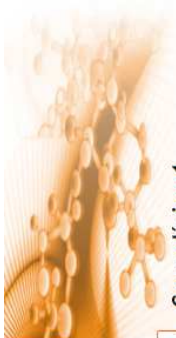

Caso clínico 1

- Presentación
- Información General
- Metodología
- Casos Clínicos
  - Caso clínico 1
  - Caso clínico 2
  - Caso clínico 3
  - Caso clínico 4
  - Caso clínico 5
- Algoritmos
- Bibliografía de apoyo
- Salir

¿Qué tratamiento considera más indicado en esta paciente?

- Amoxicilina 1gr/8h, 7-10 días (VO)
- Amoxicilina-clavulánico 8/5mg/ 125 mg/8h, 7-10 días (VO)
- Tetrromicina 800mg oral /24h, 7-10 días (VO)
- Claritromicina 500 mg oral /12h, 10 días (VO)
- Moxifloxacin 400 mg/24 h ,7-10 días (VO)

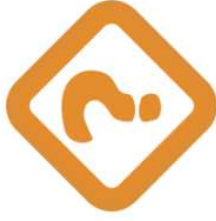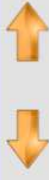

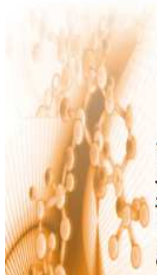

Caso clínico 1

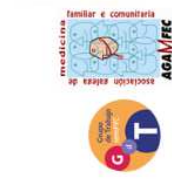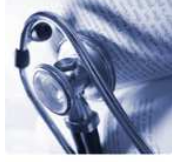

- Presentación
- Información General
- Metodología
- Casos Clínicos
  - Caso clínico 1
  - Caso clínico 2
  - Caso clínico 3
  - Caso clínico 4
  - Caso clínico 5
- Algoritmos
- Bibliografía de apoyo
- Salir

**El paciente acude 3 días después a la consulta, sin experimentar mejoría del cuadro y de la afectación general. ¿Qué tratamiento le indicaría?**

- Mantendría el mismo antibiótico pues es previsible una mejoría a partir del 3º día
- Cambiaría a amoxicilina/clavulánico 500/8h, 7-10d
- Cambiaría a levofloxacino 500 mg/24 h, 7-10 d
- Cambiaría a cefepodoxime proxetilo 200 mg/12h 7-10d
- Cambiaría a amoxicilina/clavulánico 875/8h, 7-10d

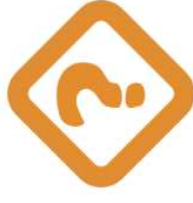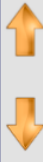



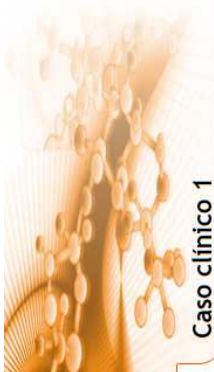

Caso clínico 1

- Presentación ▲
- Información General ▲
- Metodología ▲
- Casos Clínicos ▲
  - Caso clínico 1 ▲
  - Caso clínico 2 ▲
  - Caso clínico 3 ▲
  - Caso clínico 4 ▲
  - Caso clínico 5 ▲
- Algoritmos ▲
- Bibliografía de apoyo ▲
- Salir ▲

Sinusitis. Pautas de tratamiento

| Presentación                                                                                 | Elección                                            | Alternativos                                                                                                                          |
|----------------------------------------------------------------------------------------------|-----------------------------------------------------|---------------------------------------------------------------------------------------------------------------------------------------|
| Aguda no complicada, sin comorbilidad, inmunocompetente y sin uso reciente de antibioterapia | Amoxicilina 875-1.000mg/8h/10d/vo                   | Alérgicos a penicilinas: levofloxacino (500mg/24h/10-14 d/vo) o azitromicina (500 mg/24h/3d/vo) o claritromicina (500mg/12h/10 d/ vo) |
| Si poca o ninguna respuesta a las 72h                                                        | Amoxicilina-ác. clavulánico (1.000-125mg/8h/10d/vo) | Similar a alérgicos                                                                                                                   |
| Aguda recurrente, crónica u origen dental                                                    | Amoxicilina-ác. clavulánico (1.000-125mg/8h/10d/vo) | Levofloxacino (500 mg/24h/10-14 d/vo) y si origen dental clindamicina (600mg/8h/10 d/vo)                                              |

Manual de enfermedades infecciosas en Atención Primaria, 3ª ed. Barcelona: semfyc ediciones, 2010

- La amoxicilina es el tratamiento de elección.
- No se han demostrado diferencias significativas entre el uso de amoxicilina frente a nuevos antibióticos, ni frente a los que teóricamente presentan ventajas con respecto a neumococo resistente a penicilinas y gérmenes productores de betalactamasas.
- La duración de la terapia antibiótica es controvertida, aunque generalmente se recomiendan 8-10 días. En pacientes con respuesta lenta es aconsejable prolongarlo hasta 2 ó 3 semanas.

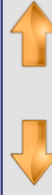

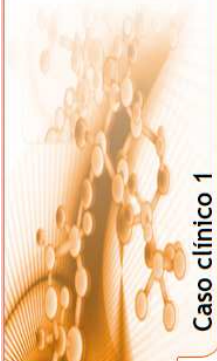

## Caso clínico 1

- Presentación ▶
- Información General ▶
- Metodología ▶
- Casos Clínicos ▶
- Caso clínico 1 +
- Caso clínico 2 +
- Caso clínico 3 +
- Caso clínico 4 +
- Caso clínico 5 +
- Algoritmos ▶
- Bibliografía de apoyo ▶
- Salir ▶

### Sinusitis. Medidas generales

No existen suficientes evidencias sobre **tratamientos coadyuvantes**, para acortar el tiempo de duración, aunque en determinados casos pueden producir un alivio de la sintomatología:

- **Analgésicos/AINE** para alivio del dolor.
- **Vasokonstrictores** (oximetazolina) nasales, menos de 5 días.
- **Lavados nasales** con suero fisiológico para favorecer el drenaje de secreciones.
- **Antihistamínicos orales**: solo pueden considerarse en caso de sinusitis crónica con evidente componente alérgico.
- **Corticoides sistémicos**.
- **Mucolíticos o fluidificantes**: No clara evidencia sobre su utilidad.
- Mantener una adecuada **hidratación** (6-10 vasos de líquido al día) y cierto grado de humedad en el hogar e incluso inhalación de vapor en la ducha.
- Dormir con la cabeza más elevada y evitar inhalar humo de tabaco o aire demasiado frío o seco.

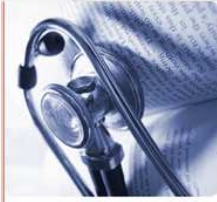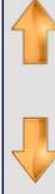

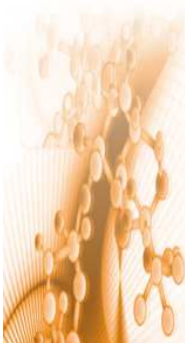

## Caso clínico 1

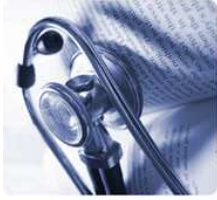

- Presentación ▲
- Información General ▲
- Metodología ▲
- Casos Clínicos ▲
- Caso clínico 1 ▲
- Caso clínico 2 ▲
- Caso clínico 3 ▲
- Caso clínico 4 ▲
- Caso clínico 5 ▲
- Algoritmos ▲
- Bibliografía de apoyo ▲
- Salir ▲

### Sinusitis complicada

- **Criterios de derivación:**
  - Sospecha o evidencia de complicaciones orbitarias o intracraneales.
  - Fiebre alta o estado tóxico.
  - Dolor facial intenso.
  - Fallo en el tratamiento.
  - Rinosinitis recurrente o crónica.
  - Inmunosupresión.
- **Tratamiento quirúrgico:** Aproximadamente el 5% de las sinusitis no se pueden resolver con tratamiento médico pudiéndose plantear la cirugía endoscópica con la finalidad de normalizar la función nasosinusal.

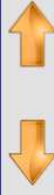

Caso clínico 1

Manejo de la rinosinusitis bacteriana aguda

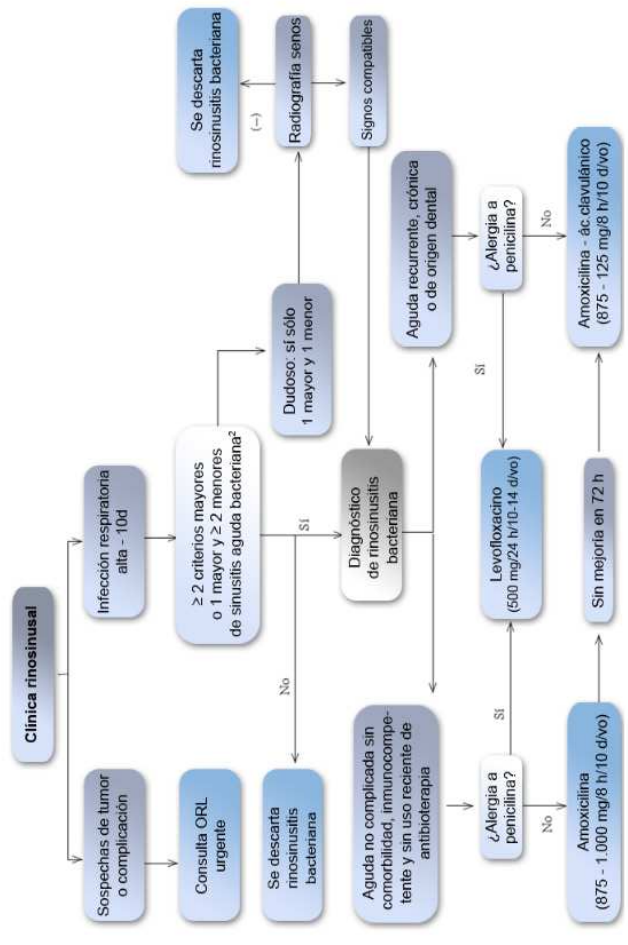

<sup>3</sup>Ver disposición de diagnóstico clínico

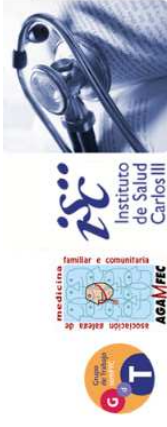

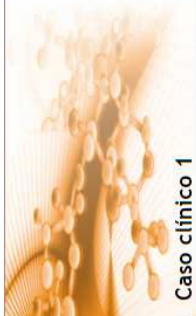

Caso clínico 1

- Presentación
- Información General
- Metodología
- Casos Clínicos
  - Caso clínico 1
  - Caso clínico 2
  - Caso clínico 3
  - Caso clínico 4
  - Caso clínico 5
- Algoritmos
- Bibliografía de apoyo
- Salir

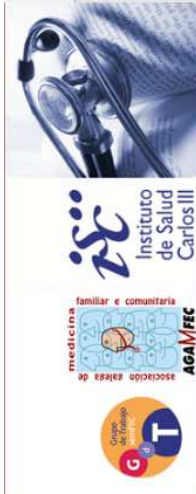

**Rinosinusitis. Grados de recomendación**

- El diagnóstico de rinosinusitis bacteriana debe ser reservado para los pacientes con síntomas de más de siete días, rinorrea purulenta con dolor o hipersensibilidad maxilar, especialmente si es unilateral, y empeoramiento de los síntomas después de una mejoría inicial (B).
- Los descongestionantes nasofaríngeos tópicos son útiles para reducir congestión nasal en la rinitis catarral aguda y no deben exceder los 5 días de tratamiento (B).
- El tratamiento sintomático con descongestionantes, anticolinérgicos y corticoides tópicos y los lavados nasales con soluciones hipertónicas pueden ser útiles para mejorar los síntomas de la rinosinusitis, aunque no afectan a la duración enfermedad (C).
- La aspiración de los senos maxilares vía transnasal es el patrón oro para el diagnóstico; sin embargo, esta técnica, al ser muy invasiva, no se debe practicar de forma rutinaria (A).
- Si bien los signos clínicos y síntomas de la sinusitis aguda difícilmente discrimina entre infección viral y bacteriana, dicha evaluación sigue siendo el mejor enfoque para el diagnóstico de sinusitis aguda (A).
- El examen radiológico convencional de los senos no está recomendado de forma rutinaria para el diagnóstico de sinusitis aguda debido a sus limitaciones diagnósticas y su baja probabilidad post-test (B).
- El uso de antibióticos para la sinusitis aguda confiere un pequeño beneficio terapéutico sobre el placebo con un correspondiente aumento en el riesgo de eventos adversos (A).
- Los antibióticos no logran un cambio importante en las curaciones clínicas, ni existen diferencias en el número de complicaciones, las tasas de recidivas y recurrencias en los (A).
- Los antibióticos sólo están recomendados en pacientes con una mayor probabilidad de enfermedad bacteriana que tienen síntomas persistentes (7 -10 días) o graves y reúnan al menos dos o más criterios de etiología bacteriana (A).
- Cuando está indicado, la amoxicilina durante 10-14 días, es el tratamiento de elección en función de su eficacia y eficiencia (A).
- Las fluorquinolonas de 3ª y 4ª generación, no confieren ningún beneficio sobre beta-lactámicos, por tanto su uso como tratamiento de primera línea no está indicado (A).

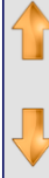

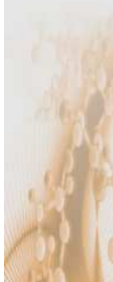

### Caso clínico 1

¿Cuál es el diagnóstico más probable?

- Rininitis aguda.
- Bronquitis aguda
- Rinosinusitis aguda bacteriana.
- Traqueítis.
- Los datos clínicos son inespecíficos y no permiten orientar un diagnóstico sindrómico.

¿Realizaría alguna prueba complementaria para establecer el diagnóstico sindrómico?

- Determinación de la proteína C reactiva (PCR)
- Una radiología simple de senos paranasales en proyección de Waters
- Una radiología simple de senos paranasales en proyección de Caldwell
- No es rentable realizar pruebas adicionales en este caso por tratarse de un cuadro no grave
- Cultivo de moco nasal

¿Cuál sería la etiología más probable de la infección que presenta este paciente?

- Haemophilus influenzae
- Moraxella catarrhalis
- Streptococcus pneumoniae
- Mycoplasma pneumoniae
- Rhinovirus

¿Iniciaría tratamiento antibiótico?

- Sí
- No

En relación con el antibiótico de la rinosinusitis bacteriana aguda, ¿es falso?

- Los venojas del tratamiento antibiótico son en general moderadas
- Los antibióticos logran un cambio importante en la tasa de recidivas, pero no en las recurrencias ni el paso a la cronicidad
- No existe evidencia que el tratamiento antibiótico inicial disminuya la frecuencia de complicaciones
- Los antibióticos están indicados si existe una elevada sospecha de origen dentario
- La antibioterapia no está indicada en las formas de sinusitis maxilar aguda leve-moderada

¿Qué tratamiento considera más indicado en esta paciente?

- Amoxicilina 1gr/8h, 7-10 días (VO)
- Amoxicilina-clavulánico 875mg/125 mg/8h, 7-10 días (VO)
- Tetramicina 800mg oral /24h, 7-10 días (VO)
- Claritromicina 500 mg oral /12h, 10 días (VO)
- Moxifloxacino 400 mg/24 h /7-10 días (VO)

El paciente acude 3 días después a la consulta, sin experimentar mejoría del cuadro y de la afectación general. ¿Qué tratamiento le indicaría?

- Mantenería el mismo antibiótico pues es previsible una mejoría a partir del 3º día
- Cambiaría a amoxicilina/clavulánico 500/8h, 7-10d
- Cambiaría a levofloxacino 500 mg/24 h, 7-10 d
- Cambiaría a amoxicilina-clavulánico 875mg/125mg/8h, 7-10d

¿Quiere modificar o repasar las preguntas que ha respondido durante el Caso Clínico?  
 Estas preguntas finales, tendrán carácter evaluatorio

Sí  
 No

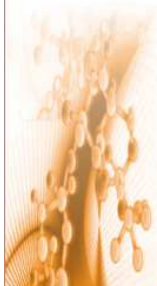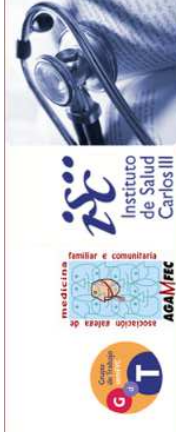

## Caso clínico superado

Informe de respuestas a las preguntas test

| Pregunta                                                                                                                                       | Respuesta Previa | Respuesta Definitiva | Respuesta Verdadera |
|------------------------------------------------------------------------------------------------------------------------------------------------|------------------|----------------------|---------------------|
| ¿Cuál es el diagnóstico más probable?                                                                                                          | ✓                | ✓                    |                     |
| ¿Realizaría alguna prueba complementaria para establecer el diagnóstico sintromico?                                                            | ✓                | ✓                    |                     |
| ¿Cuál sería la etiología más probable de la infección que presenta este paciente?                                                              | ✓                | ✓                    |                     |
| ¿Iniciaría tratamiento antibiótico?                                                                                                            | ✓                | ✓                    |                     |
| En relación con el antibiótico de la rinosinusitis bacteriana aguda, ¿es falso?                                                                | ✓                | ✓                    |                     |
| ¿Qué tratamiento considera más indicado en esta paciente?                                                                                      | ✓                | ✓                    |                     |
| El paciente acude 3 días después a la consulta, sin experimentar mejoría del cuadro y de la afectación general. ¿Qué tratamiento le indicaría? | ✓                | ✓                    |                     |
| 7 de 7                                                                                                                                         |                  |                      | 7 de 7              |

Tiempo total usado:

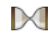

01:31:06
