# Supplementary material for: Impact of a multifaceted intervention to improve antibiotic prescribing: a pragmatic cluster-randomised controlled trial
Source: PubMed Central journal article supplement (PMC7722452; doi:10.1186/s13756-020-00857-9), 2020-12-07
Supplement: 13756_2020_857_MOESM4_ESM.pdf [file 13756_2020_857_MOESM4_ESM.pdf]

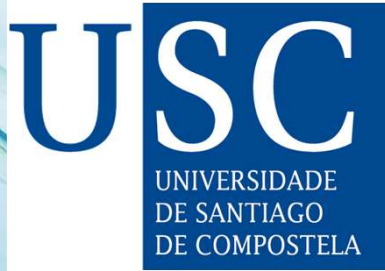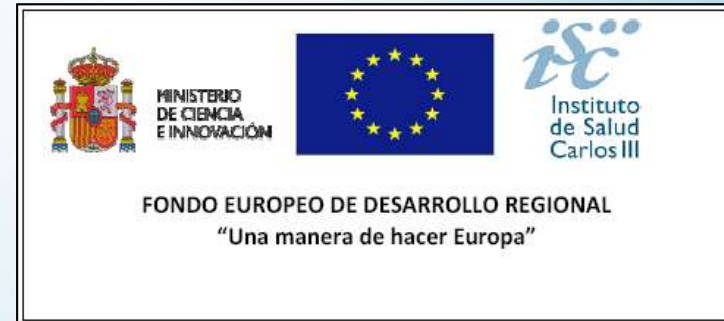

---

# Rational use of antibiotics in primary care

---

**CRISTIAN GONZÁLEZ GONZÁLEZ**

Departamento de Medicina Preventiva y Salud Pública

Universidade de Santiago De Compostela

## Importance

### 2.3.2 Human burden of antibiotic resistance

The estimated human burden of infections due to the selected antibiotic-resistant bacteria is presented in Table 2.

The study confirmed that MRSA was, in 2007, the most common, single, multidrug-resistant bacterium in the EU as per the estimated number of cases of infection due to this bacterium. However, the sum of cases of antibiotic-resistant Gram-positive bacteria (mostly MRSA and vancomycin-resistant *Enterococcus faecium*) was comparable to that of antibiotic-resistant Gram-negative bacteria (third-generation cephalosporin-resistant *E. coli* and *K. pneumoniae*, and carbapenem-resistant *P. aeruginosa*).

Overall, it was estimated that in 2007 approximately 25 000 patients died from an infection due to any of the selected frequent antibiotic-resistant bacteria in the EU, Iceland and Norway. Notably, about two thirds of these deaths were caused by infections due to Gram-negative bacteria. In addition, infections due to any of the selected antibiotic-resistant bacteria resulted in approximately 2.5 million extra hospital days.

### 2.3.3 Economic burden of antibiotic resistance

The estimated economic burden of infections due to the selected antibiotic-resistant bacteria is presented in Table 3.

Based on the number of extra hospital days, extra in-hospital costs in 2007 were estimated at more than EUR 900 million in the EU, Iceland and Norway.

Based on 2007 data, outpatient care costs were estimated at about EUR 10 million and productivity losses due to absence from work of infected patients were estimated at more than EUR 150 million, each year. Productivity losses due to patients who died from their infection were estimated at about EUR 450 million each year. Overall, societal costs of infections due to the selected antibiotic-resistant bacteria were estimated at about EUR 1.5 billion each year.

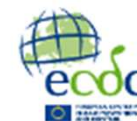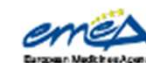

TECHNICAL REPORT

## bacterial challenge: time to react

A call to narrow the gap between  
multidrug-resistant bacteria in the EU and  
the development of new antibacterial agents

www.ecdc.europa.eu  
www.ema.europa.eu

# Background

## Importance

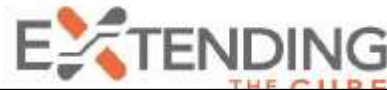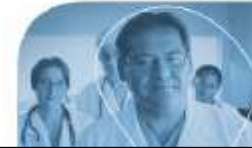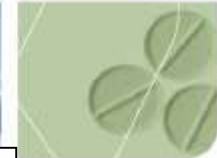

**Figure 1:** 14 classes of antibiotics were introduced for human use between 1935 and 1968; since then, 5 have been introduced.

**Figure 2:** The number of new systemic antibiotic agents has declined since 1980, and most (75%) of these drugs are in two classes, beta-lactams and quinolones.

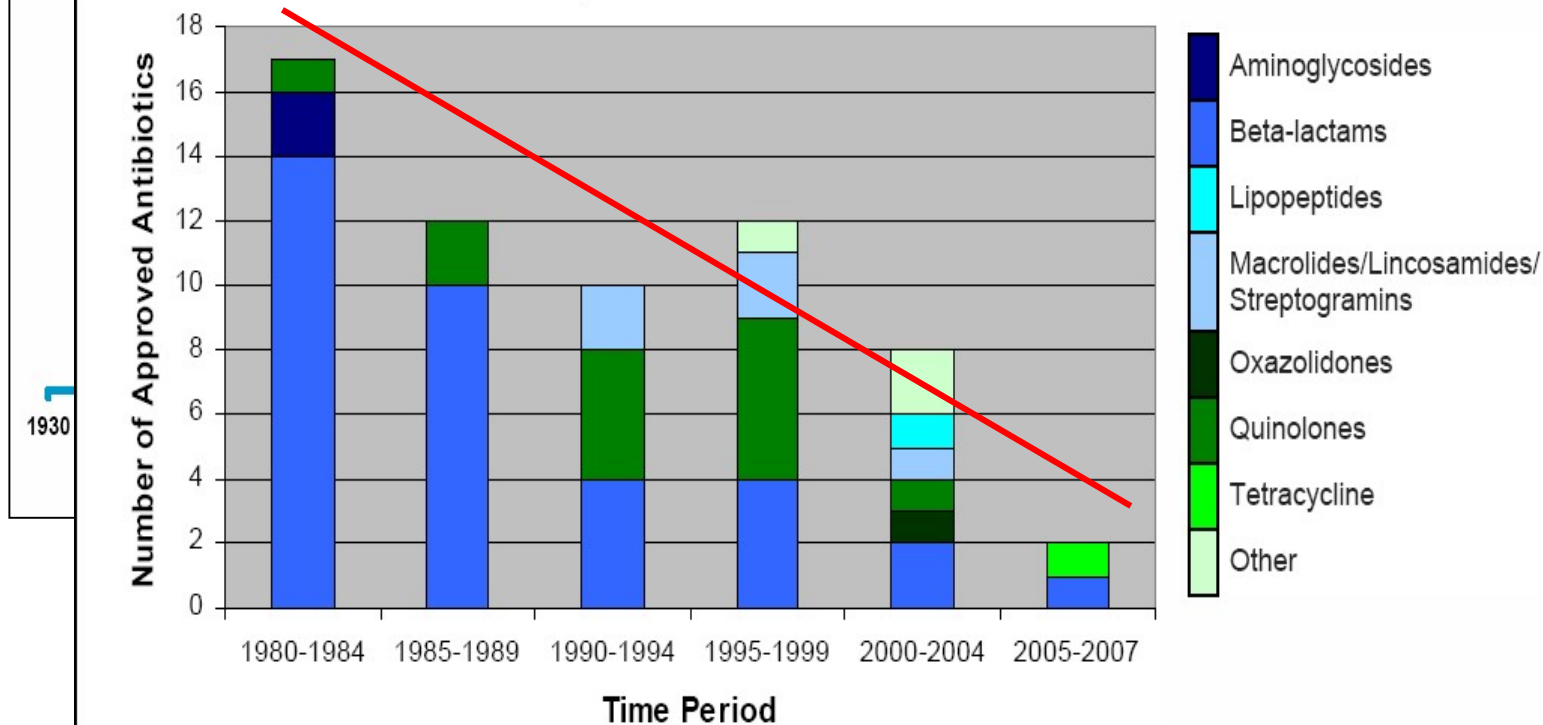

RESISTANCE

MAY 2008

The next three research: 14 entering novel (le for human ed resistance s, for example— void. More tic classes has es have been ose are limited

tics

new proved by the 1980 (see s. This has left born forms of (cous aureus): s caused by sionally e market.

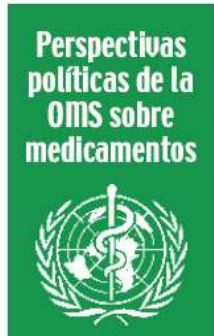

Abril de 2005  
Organización Mundial de la Salud  
Ginebra

10

## La contención de la resistencia a los antimicrobianos

### El problema de la resistencia a los antimicrobianos

La resistencia a los antimicrobianos (RAM) es uno de los problemas de salud pública más graves del mundo. Muchos de los microbios (bacterias, virus, protozoos) que causan enfermedades infecciosas han dejado de responder a los antimicrobianos de uso común (antibacterianos, como los antibióticos, antivíricos y antiprotozoarios). El problema es tan grave que, si no se emprende una acción concertada a escala mundial, corremos el riesgo de regresar a la era preantibiótica, época en que morían muchos más niños que ahora por causa de enfermedades infecciosas y no era posible practicar intervenciones quirúrgicas mayores debido al riesgo de infección. Las enfermedades infecciosas más importantes matan a más

### El problema de la resistencia a los antimicrobianos

La resistencia a los antimicrobianos (RAM) es uno de los problemas de salud pública más graves del mundo. Muchos de los microbios (bacterias, virus, protozoos) que causan enfermedades infecciosas han dejado de responder a los antimicrobianos de uso común (antibacterianos, como los antibióticos, antivíricos y antiprotozoarios). El problema es tan grave que, si no se emprende una acción concertada a escala mundial, corremos el riesgo de regresar a la era preantibiótica, época en que morían muchos más niños que ahora por causa de enfermedades infecciosas y no era posible practicar intervenciones quirúrgicas mayores debido al riesgo de infección. Las enfermedades infecciosas más importantes matan a más

## Outpatient antibiotic use in Europe and association with resistance: a cross-national database study

Herman Goossens, Matus Ferech, Robert Vander Stichele, Monique Elseviers, for the ESAC Project Group

### Summary

**Background** Resistance to antibiotics is a major public-health problem and is recognised as the main selective pressure driving this resistance. Our aim was to assess the association between outpatient antibiotic use and the association with resistance.

**Methods** We investigated outpatient antibiotic use in 26 countries in Europe using comparable distribution or reimbursement data, between Jan 1, 1997, and Dec 31, 2000, of defined daily doses (DDD) per 1000 inhabitants per day, according to WHO classification and DDD measurement methodology. We assessed the ecological and antibiotic resistance rates using Spearman's correlation coefficients.

**Findings** Prescription of antibiotics in primary care in Europe varied greatly; (32.2 DDD per 1000 inhabitants daily) and the lowest was in the Netherlands (10.0 DDD). We noted a shift from the old narrow-spectrum antibiotics to the new broad-spectrum antibiotics. We noted striking seasonal fluctuations with heightened winter peaks in countries with high consumption. We showed higher rates of antibiotic resistance in high consuming countries, and consumption in southern and eastern Europe than in northern Europe.

**Interpretation** These data might provide a useful method for assessing public-health antibiotic use and resistance levels.

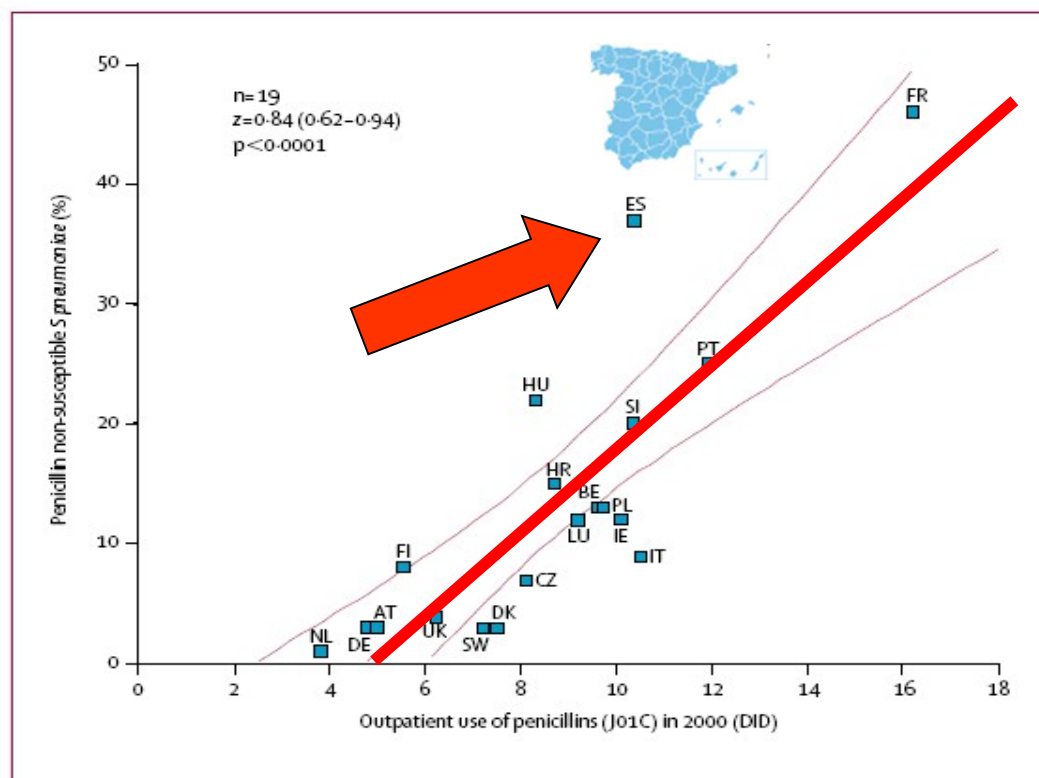

Figure 6: Correlation between penicillin use and prevalence of penicillin non-susceptible *S pneumoniae*. AT, Austria; BE, Belgium; HR, Croatia; CZ, Czech Republic; DK, Denmark; FI, Finland; FR, France; DE, Germany; HU, Hungary; IE, Ireland; IT, Italy; LU, Luxembourg; NL, The Netherlands; PL, Poland; PT, Portugal; SI, Slovenia; ES, Spain; UK, England only.

Importance

Consumption-resistance

Relation of long-term consumption and resistance: co-selection of resistance.

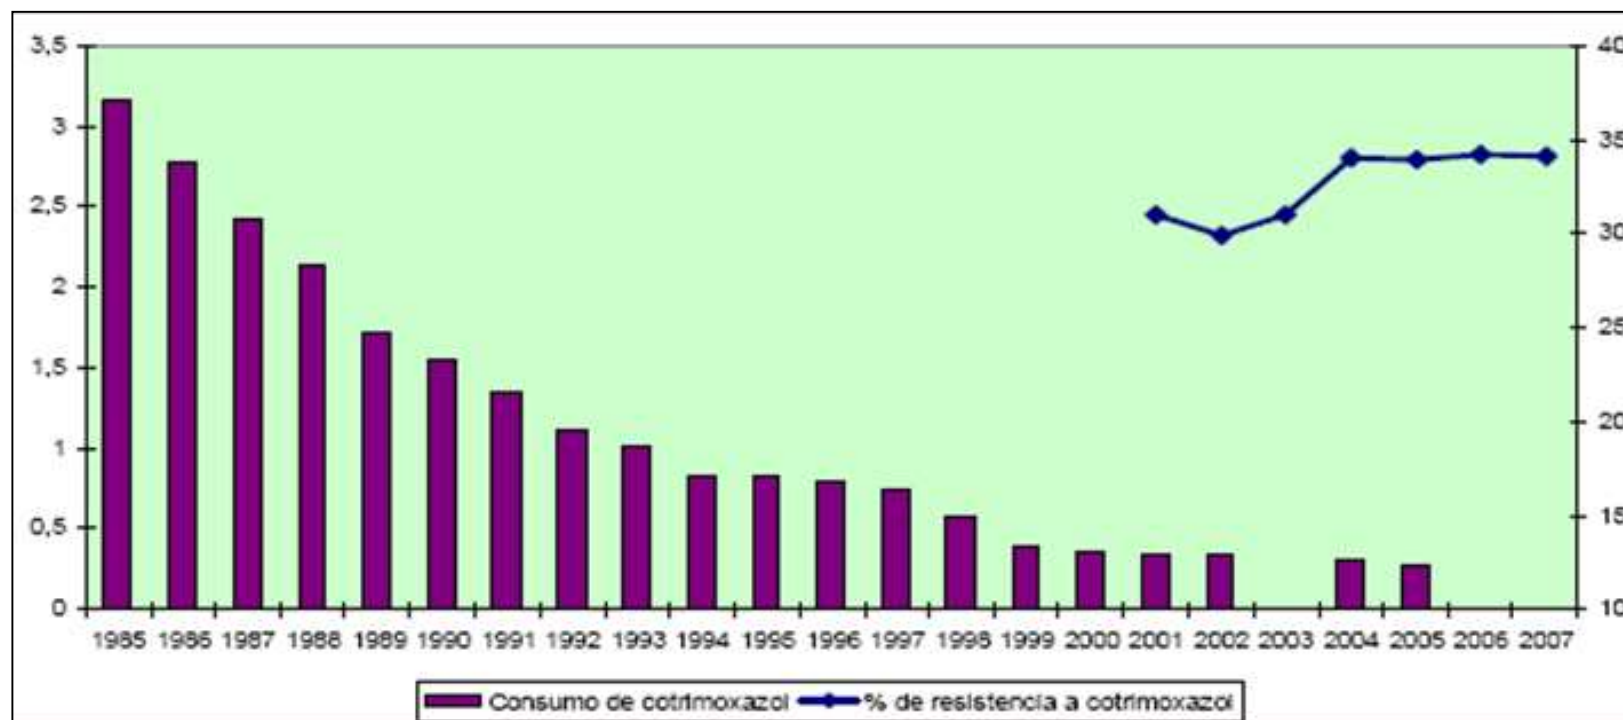

Oteo J. 2008

# Background

Importance

Consumption-resistance

Europe-Spain

## THE LANCET

Articles

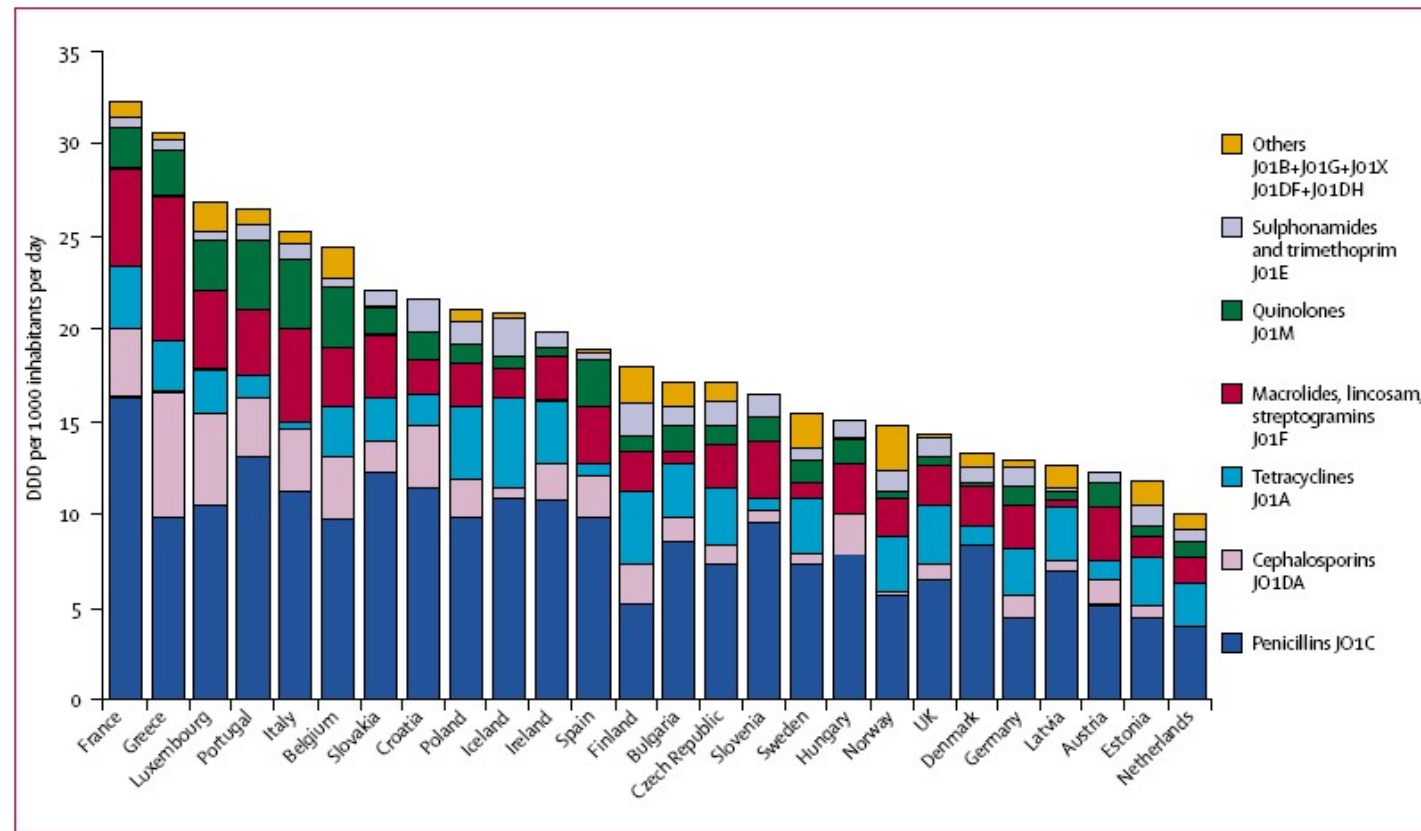

Figure 1: Total outpatient antibiotic use in 26 European countries in 2002

Lancet 2005; 365: 579-87

See Comment page 548

\*Members listed at end of report

ESAC Management Team,  
Department of Microbiology,  
University of Antwerp, B-2610  
Antwerp, Belgium  
(Prof H Goossens MD,  
M Feresh PharmD,  
R Vander Stichele MD,  
M Elseviers PhD); and  
Department of Medical  
Microbiology, Leland  
University Medical Centre,  
Netherlands (H Goossens)

Correspondence to:

Prof H Goossens

Herman.Goossens@uza.be

# Current Situation

Importance

Consumption-resistance

Europe-Spain

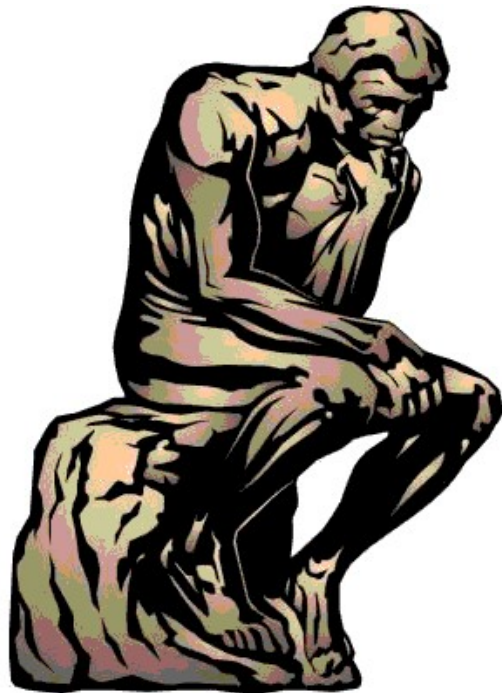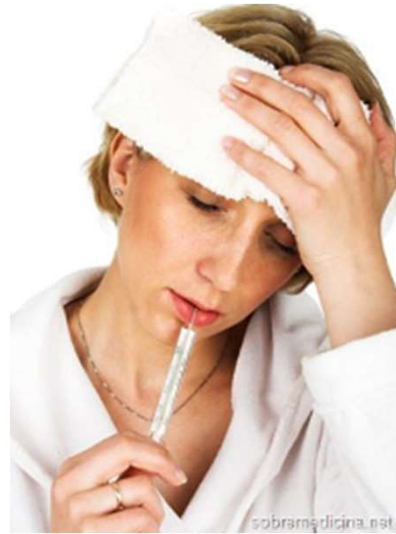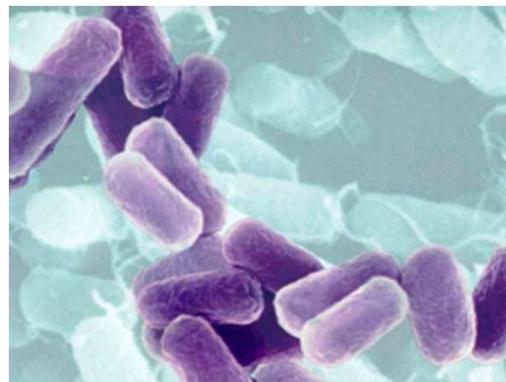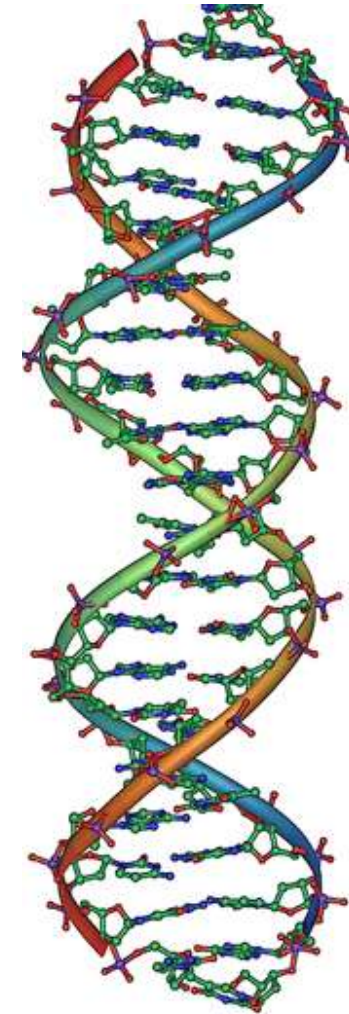



# Background

Importance

Consumption-resistance

Europe-Spain

## THE LANCET

Articles

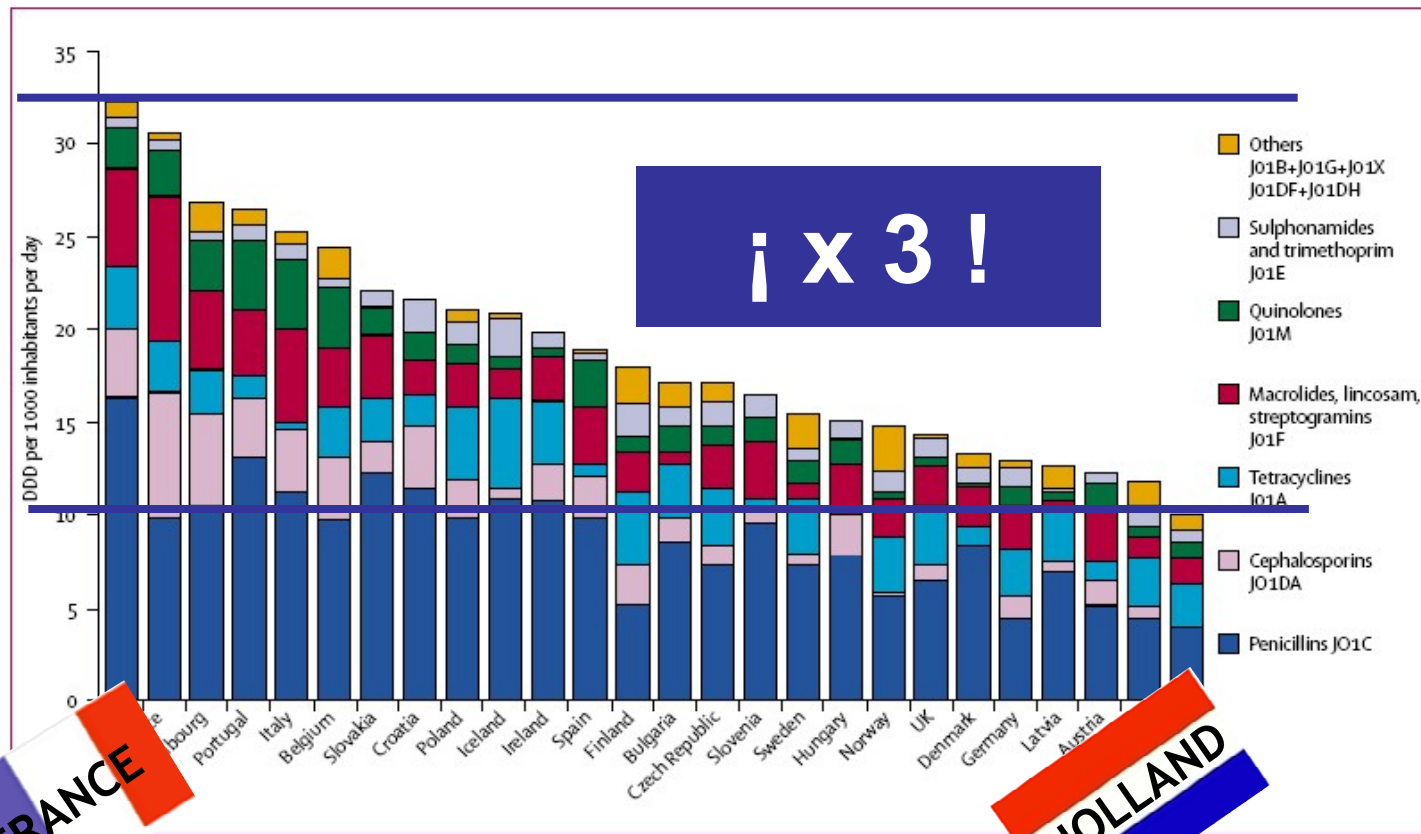

Total outpatient antibiotic use in 26 European countries in 2002

Lancet 2005; 365: 579-87

See Comment page 548

\*Members listed at end of report

ESAC Management Team,  
Department of Microbiology,  
University of Antwerp, B-2610  
Antwerp, Belgium

(Prof H Goossens MD,  
M Feresh PharmD,  
R Vander Stichele MD,  
M Elseviers PhD); and  
Department of Medical  
Microbiology, Leland  
University Medical Centre,  
Netherlands (H Goossens)

Correspondence to:

Prof H Goossens

Herman.Goossens@uza.be

# Current Situation

Importance

Consumption-resistance

Europe-Spain

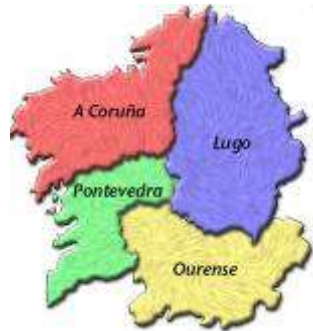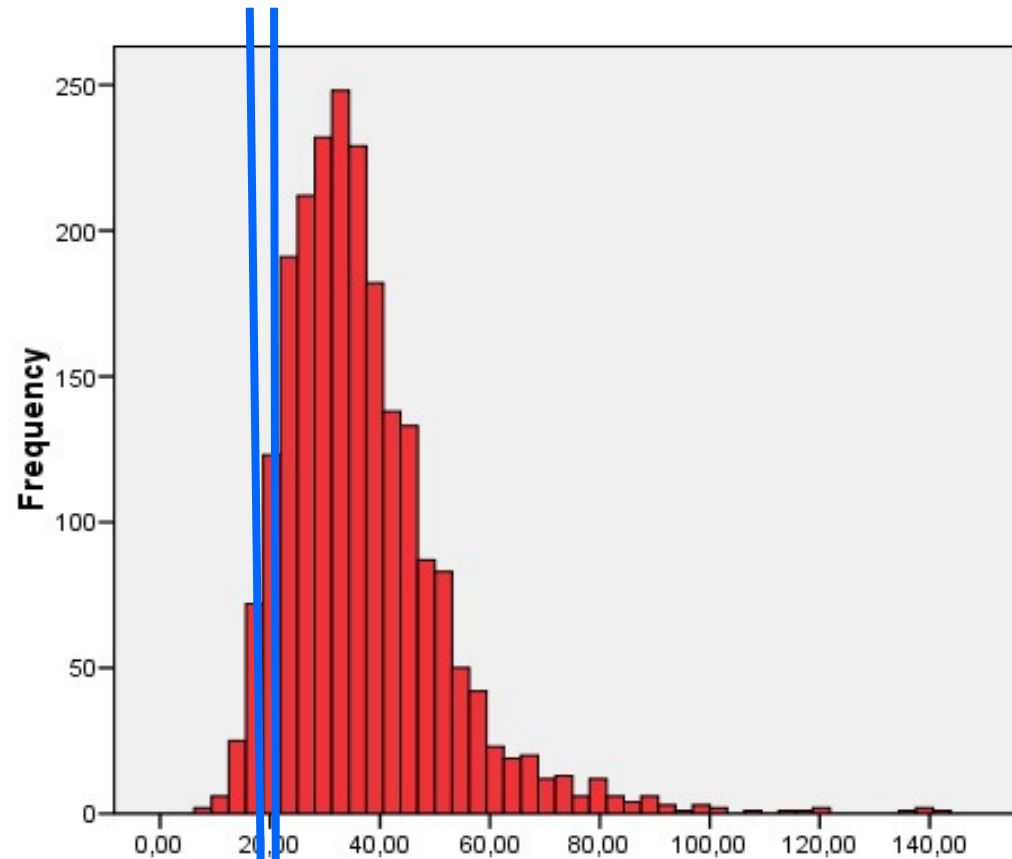

(2009 ESAC) EUROPE

SPAIN (2009 ESAC)

BMJ

RESEARCH

## Variation in antibiotic prescribing and its impact on recovery in patients with acute cough in primary care: prospective study in 13 countries

C C Butler, professor,<sup>1</sup> K Hood, director,<sup>2</sup> T Verheij, professor,<sup>3</sup> P Little, professor,<sup>4</sup> H Melbye, professor,<sup>5</sup> J Nuttall, senior trial manager,<sup>2</sup> M J Kelly, statistician,<sup>2</sup> S Mölsted, professor,<sup>6</sup> M Godycki-Cwirko, physician,<sup>7</sup> J Almirall, professor,<sup>8</sup> A Torres, professor,<sup>9</sup> D Gillespie, trainee statistician,<sup>2</sup> U Rautakorpi, senior medical officer,<sup>10</sup> S Coenen, postdoctoral fellow,<sup>11,12</sup> H Goossens, professor<sup>13</sup>

<sup>1</sup>Department of Primary Care and Public Health, School of Medicine, Cardiff University, Cardiff CF14 4XN, Wales

<sup>2</sup>South East Wales Trials Unit (SEWTU), Department of Primary Care and Public Health, School of Medicine, Cardiff University, Heath Park, Cardiff, Wales

<sup>3</sup>University Medical Centre Utrecht, Julius Center for Health, Sciences and Primary Care, Universiteitsweg 100, Stratum

### ABSTRACT

**Objective** To describe variation in antibiotic prescribing for acute cough in contrasting European settings and the impact on recovery.

**Design** Cross sectional observational study with clinicians from 14 primary care research networks in 13 European countries who recorded symptoms on presentation and management. Patients followed up for 28 days with patient diaries.

**Setting** Primary care.

antibiotic prescribing is not associated with clinically important differences in recovery.

**Trial registration** Clinicaltrials.gov NCT00353951.

### INTRODUCTION

Antibiotic resistance is a growing problem worldwide, with 10% of *Streptococcus pneumoniae* isolates recorded as non-susceptible to penicillin in 30 countries in 2007.<sup>1</sup> There is wide variation in antibiotic prescribing for ambulant patients in Europe.<sup>2</sup> We do not know if

Importance

Consumption-resistance

Europe-Spain

Primary care

## Factors influencing the prescription of antibiotics by primary care doctors

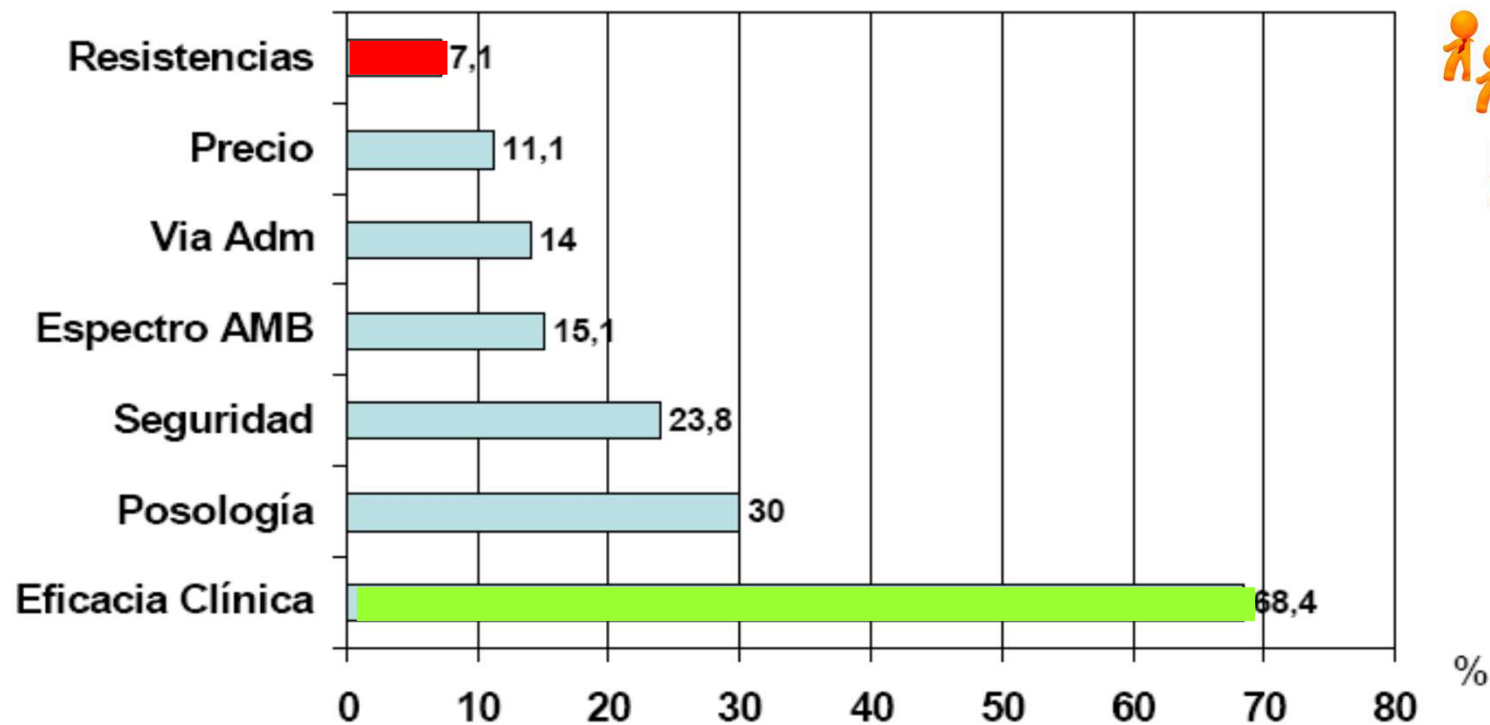

Ripoll MA et al, Rev Esp Quimioter 2008;21(1):26-31

# Current Situation

Importance

Consumption-resistance

Europe-Spain

Primary care

ISSN 0305-7192

# MEDICINA CLINICA

www.elsevier.es/medicinaclicinica

Indicadores: Science Citation Index - Journal Citation Reports - Index Medicus/MEDLINE - Current Contents/Clinical Medicine - Index Medicus Español - Europa Medicapress - HSPA - SCOPUS - MEDLINE

Sábado 23 de Abril de 2011. Volumen 136 - Número 11

|                                                                                                                                                                           |  |                                                                                                                                                |  |
|---------------------------------------------------------------------------------------------------------------------------------------------------------------------------|--|------------------------------------------------------------------------------------------------------------------------------------------------|--|
| <b>Medicina Clínica en breve</b>                                                                                                                                          |  | <b>Conferencia clinicopatológica</b>                                                                                                           |  |
| <b>Originales</b>                                                                                                                                                         |  | Mujer de 47 años con diabetes progresiva, tusefación cutánea y pteridris de forma                                                              |  |
| La hemoglobina glicosilada como marcador de riesgo de hipercalcemia en la población general                                                                               |  | S. Puig, P. Argán y J.M. Carr                                                                                                                  |  |
| E. García-Escobar, V. Pérez-Vidal, D. Moreda, S. Vallet, R. Valverde, V. Baranda, M.I. Velasco, M.S. Ruiz de Adana, M. Rodríguez-Igúzquiza, G. Rojo-Martínez y F. Soriano |  | 495-500                                                                                                                                        |  |
| <b>Original breve</b>                                                                                                                                                     |  | <b>Preguntas y respuestas en farmacología clínica</b>                                                                                          |  |
| Eficacia y seguridad de sustitutos de degeneración macular neovascular asociada a la edad                                                                                 |  | Eficacia de los glucocorticoides y los antiácidos en el tratamiento de la parálisis de Bell                                                    |  |
| J.M. Real Campaña, P. Carrero Lozano, C. Torres Fernández-Bueno, R. Buerre Lacort, I. Novela Martínez y M.J. Robinson Hernández                                           |  | V. Pulvirenti e I. Durré Carreira                                                                                                              |  |
| 471-477                                                                                                                                                                   |  | 501-503                                                                                                                                        |  |
| <b>Original breve</b>                                                                                                                                                     |  | <b>Cartas científicas</b>                                                                                                                      |  |
| Prevalencia de obesidad en la población gestante de Gran Canaria                                                                                                          |  | Frecuencia y variabilidad de valores extremadamente bajos de colesterol ligado a lipoproteínas de alta densidad                                |  |
| I. Acuña-Castillo, M. Almodín-Pérez, J.J. García-Salvador, A. González-Quesada, J.A. García-Hernández y I. Serra-Majem                                                    |  | J.D. García-Díaz, J.M. Hernández Rey, M.J. Caspar Riquelme y A. López de Guzmán                                                                |  |
| 478-480                                                                                                                                                                   |  | 504-505                                                                                                                                        |  |
| <b>Editorial</b>                                                                                                                                                          |  | Relación entre presión arterial y laxitud articular                                                                                            |  |
| Hipercalcemia y alteración del metabolismo de la glucosa: implicaciones de una relación compleja                                                                          |  | G. Piñero, O. Meroño, A. Aguiló y A. Balboa                                                                                                    |  |
| M. Bernal                                                                                                                                                                 |  | 505-506                                                                                                                                        |  |
| <b>Revisión</b>                                                                                                                                                           |  | <b>Cartas al Editor</b>                                                                                                                        |  |
| Sistemas de soporte hepático artificial. Revisión de la bibliografía médica                                                                                               |  | Elegido de tratamientos complementarios y alternativos en una población de pacientes de Zaragoza con insuficiencia renal crónica hemodializada |  |
| S. Lofgren, M.J. Bernal y A. Escorial                                                                                                                                     |  | M. Ortiz-Lacort, V. Pizarro Ruiz y R. Sáez Piñel                                                                                               |  |
| 484-487                                                                                                                                                                   |  | 506-507                                                                                                                                        |  |
| <b>Artículos especiales</b>                                                                                                                                               |  | <b>Cartas al Editor</b>                                                                                                                        |  |
| La interconsulta médica: problemas y soluciones                                                                                                                           |  | Consumo de opiáceos en el síndrome coronario agudo                                                                                             |  |
| E. Montero Ruiz y J. López-Alvarez                                                                                                                                        |  | X. Carrillo, A. Caró, J. Serra y V. Valle                                                                                                      |  |
| 488-490                                                                                                                                                                   |  | 508-509                                                                                                                                        |  |
| Límites en la intersección avanzada del embarazo                                                                                                                          |  | <b>Respuestas</b>                                                                                                                              |  |
| P.J. Torres Pons                                                                                                                                                          |  | M. Trío-Iturró y I. Morzano                                                                                                                    |  |
| 491-494                                                                                                                                                                   |  | 509-510                                                                                                                                        |  |
|                                                                                                                                                                           |  | <b>Imagen de la semana</b>                                                                                                                     |  |
|                                                                                                                                                                           |  | Ulipizilis subcutánea secundaria a intoxicación por glucocorticoides                                                                           |  |
|                                                                                                                                                                           |  | E. Marco, J.M. Muñoz, E. Duarte y F. Escalado                                                                                                  |  |
|                                                                                                                                                                           |  | 511-513                                                                                                                                        |  |

Data distribution according to percentage of correct and incorrect prescription of antibiotic in Primary Care. *Med Clin.*

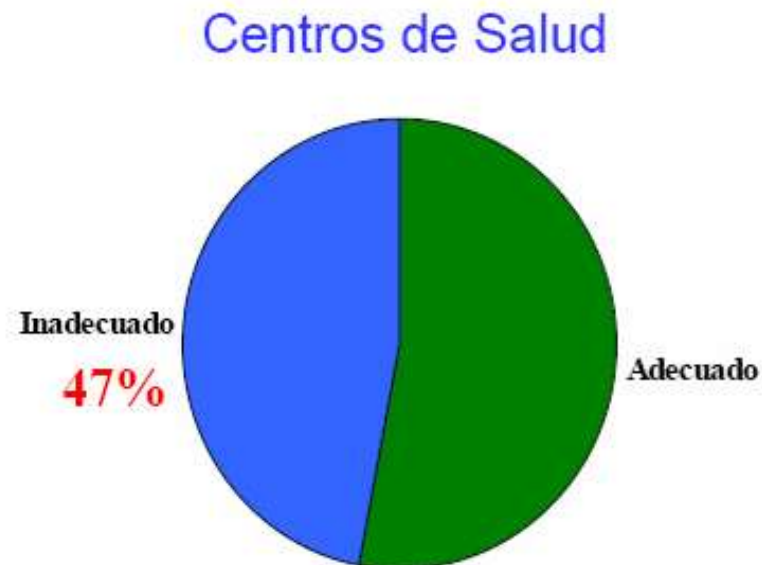

Saturno PJ. Med Clin (Barc)

Importance

Consumption-resistance

Europe-Spain

Primary Care

SOLUTION

## CONDITIONING FACTORS OF THE PRESCRIPTION OF ANTIBIOTICS IN Primary CARE:

Patient pressure

Industrial pressure

Fear / Uncertainty

Adherence to clinical guidelines

Access to clinical tests

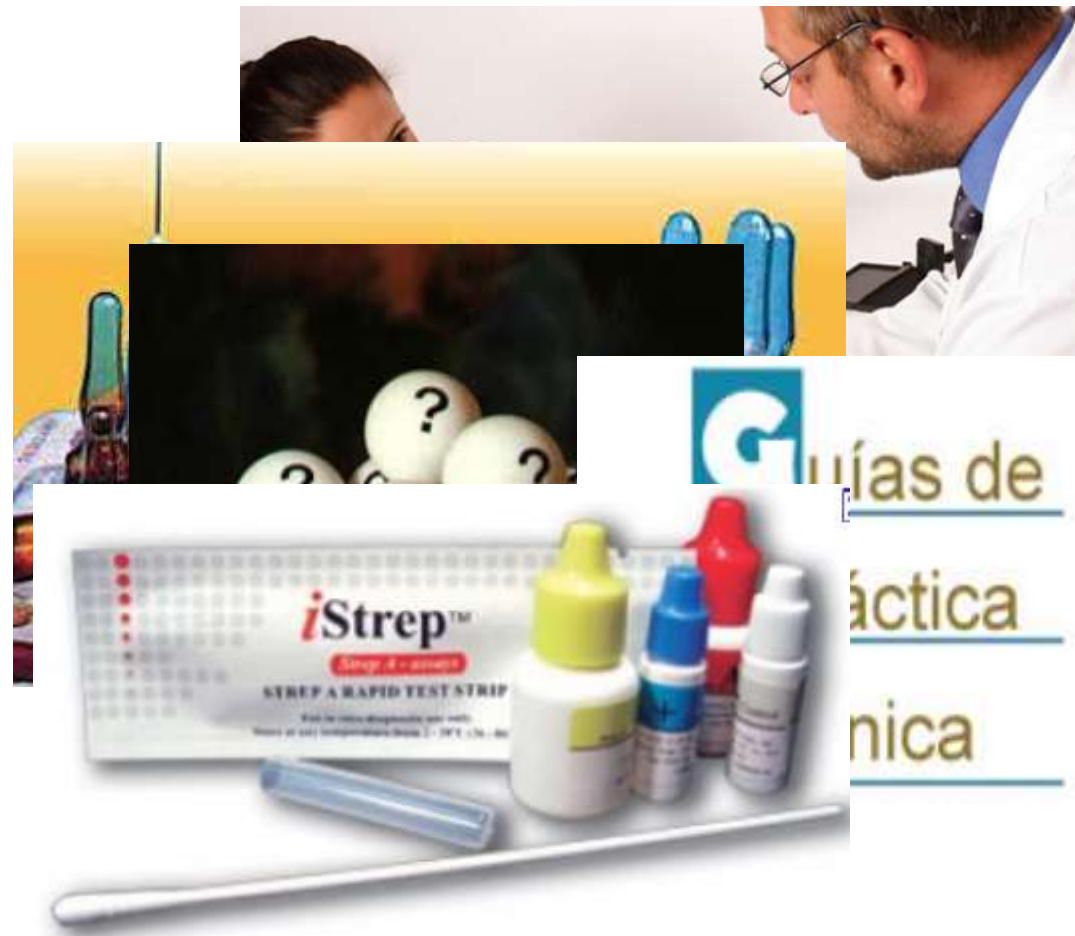

Importance

Consumption-resistance

Europe-Spain

Primary Care

SOLUTION

## CONDITIONING FACTORS OF THE PRESCRIPTION OF ANTIBIOTICS IN Primary CARE:

Patient pressure

~~Industrial pressure~~

Fear / Uncertainty

Adherence to clinical guidelines

~~Access to clinical tests~~

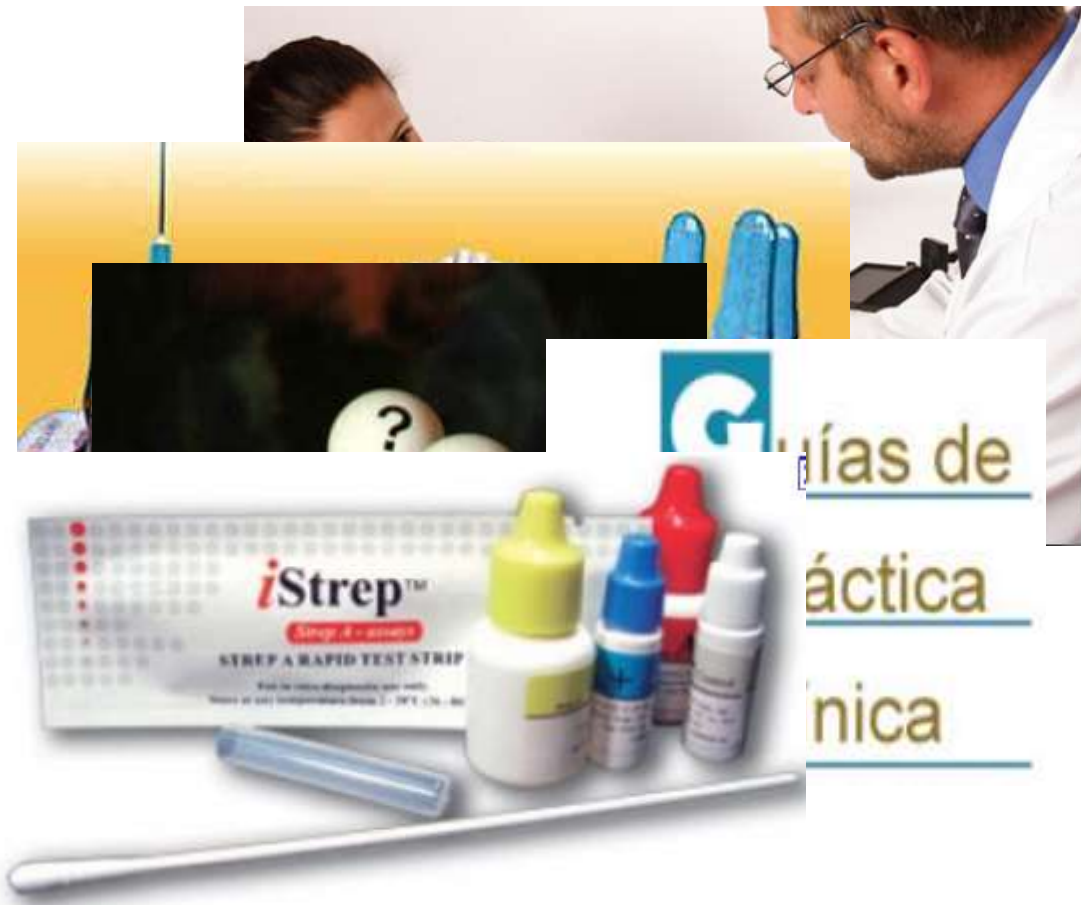

# Current Situation

Importance

Consumption-resistance

Europe-Spain

Primary Care

SOLUTION

Patient pressure

Communication Skills

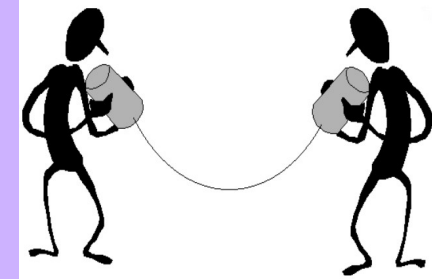

Fear / Uncertainty

Adherence to  
clinical guidelines



Importance

Consumption-resistance

Europe-Spain

Primary Care

SOLUTION

## PATIENT PRESSURE: COMMUNICATION SKILLS

Improve patient-doctor communication.

In 50% of the cases:

- NO detected complaints
- Patient and doctor. NO agreement

The patient can not describe his/her problem

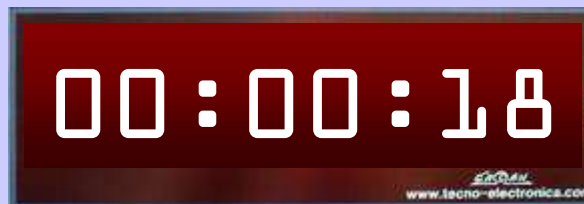

# BMJ

### The Toronto consensus

part, Peter Maguire, Mack Lipkin, Dennis Novack,

substantial deficiencies when studied. Only a low proportion of visits with doctors include any patient education,<sup>15</sup> and a surprisingly high proportion of patients do not understand or remember what their physicians tell them about diagnosis and treatment.<sup>16</sup> Cultural differences also impede the work with patients.<sup>17,18</sup>

Patient anxiety and dissatisfaction is related to uncertainty and lack of information, explanation, and feedback from the doctor. Yet doctors often misperceive the amount and type of information patients want. The language doctors use is often unclear, both as regards the use of jargon and in relation to a lack of the expected shared meanings of relatively common terms.<sup>20-23</sup>

Importance

Consumption-resistance

Europe-Spain

Primary Care

SOLUTION

## PATIENT PRESSURE: COMMUNICATION SKILLS

### ✓ Non-verbal behavior:

Impersonal tone of voice

Rude and distant

Speak rapidly

G

P

For this, antibiotic is  
not needed

(type book))

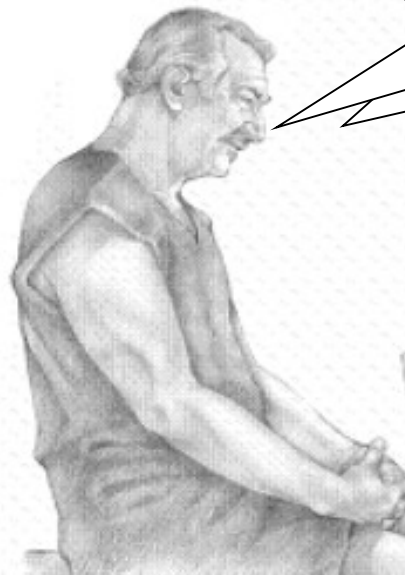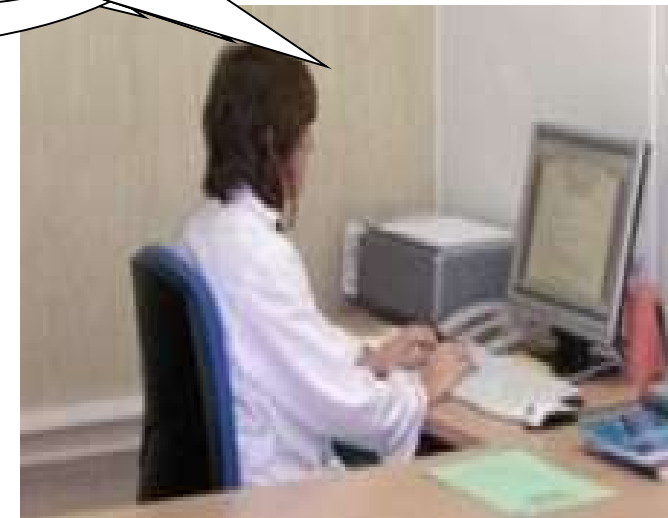

# Current Situation

Importance

Consumption-resistance

Europe-Spain

Primary Care

SOLUTION

***Little ASSERTIVITY***

***Low EMPATHY***

***No Point of AGREEMENT***

*Outcome:*

***Poor adherence to treatment***

*Consequences for the patient:*

***Passivity towards doctor's recommendations***

*Consequences for the physician:*

***NO Closeness to the patient***

***Burn out professional***

Importance

Consumption-resistance

Europe-Spain

Primary Care

SOLUTION

## PATIENT PRESSURE: COMMUNICATION SKILLS

### ✓ Non-verbal behaviour:

Conversational voice tone

Speak fluently

First person message

Patient.co

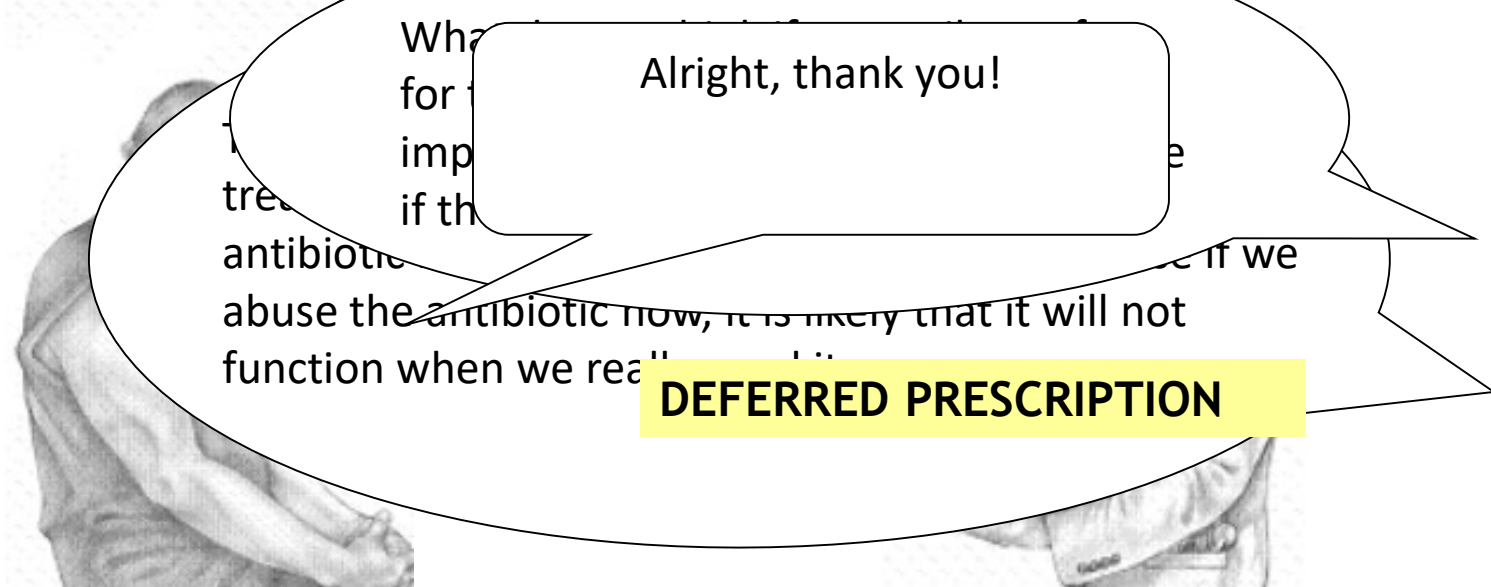

**NEGOTIATION: reach to an agreement between both**

# Current Situation

Importance

Consumption-resistance

Europe-Spain

Primary Care

SOLUTION

**ASSERTIVENESS**

**EMPATHY**

**NEGOTIATION**

*Results:*

More adherence to treatment

Positive assessment of the physician

*Consequences for the physician:*

*Closeness to the patient*

*Work satisfaction*

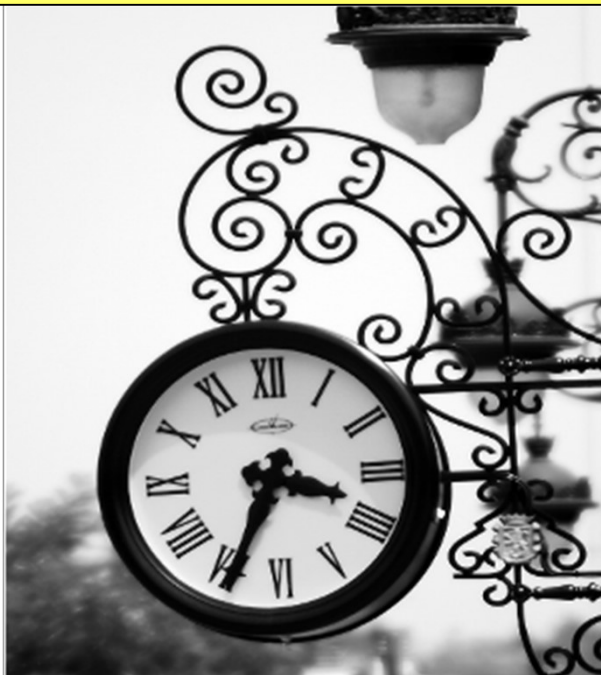

**THE CONSULTATION TIME DOES NOT INCREASE**

# Current Situation

Importance

Consumption-resistance

Europe-Spain

Primary Care

SOLUTION

## Recuerde

- Los antibióticos no son eficaces contra los resfriados ni la gripe
- Tome los antibióticos de forma responsable y sólo cuando se los recete el médico
- Todos somos responsables de conseguir que los antibióticos sigan siendo eficaces

### Cuando los *necesite*, utilice los antibióticos de manera responsable

Cuando le receten antibióticos, siga las instrucciones del médico para minimizar el riesgo de desarrollar bacterias resistentes.

Si no sigue las instrucciones correctamente —si, por ejemplo, acorta la duración del tratamiento o toma una dosis menor o no toma los antibióticos en los momentos correctos que le haya prescrito el médico—, las bacterias pueden adquirir resistencia a los antibióticos.

Las bacterias resistentes pueden quedarse en su organismo y también pueden transmitirse a otras personas. Esto le expone a usted y expone a otros al riesgo de no responder a los antibióticos la próxima vez que los vuelva a necesitar.

- Siga las instrucciones de su médico y tome los antibióticos cuándo y cómo él se lo indique
- No utilice los antibióticos que le sobren
- Pregunte a su médico o farmacéutico cómo debe tirar los antibióticos que le sobren

EUROPEAN  
ANTIBIOTIC  
AWARENESS DAY

A European Health Initiative

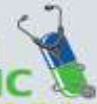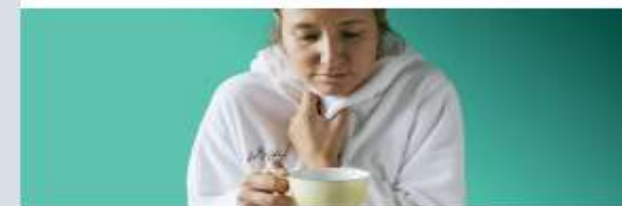

## Uso responsable de los antibióticos

Contribuya a mantener la eficacia de los antibióticos

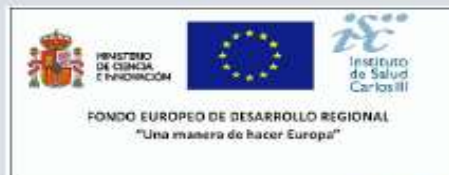

# Current Situation

Importance

Consumption-resistance

Europe-Spain

Primary Care

SOLUTION

Patient pressure

Communication skills  
Deferred Prescription  
Supporting material

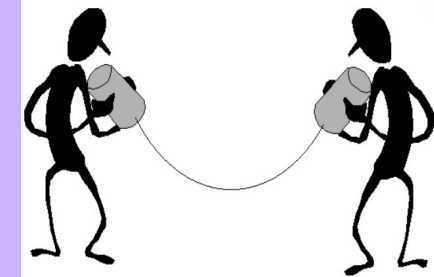

Fear / Uncertainty

Deferred Prescription

| D  | L  | M  | M  | J  | V  | S  |
|----|----|----|----|----|----|----|
| 3  | 4  | 5  | 6  | 7  | 8  | 9  |
| 10 | 11 | 12 | 13 | 14 | 15 | 16 |
| 17 | 18 | 19 | 20 | 21 | 22 | 23 |
| 24 | 25 | 26 | 27 | 28 | 29 | 30 |

Adherence to  
clinical guidelines

## Delayed antibiotics for respiratory infections (Review)

Spurling GKP, Del Mar CB, Dooley L, Foxlee R

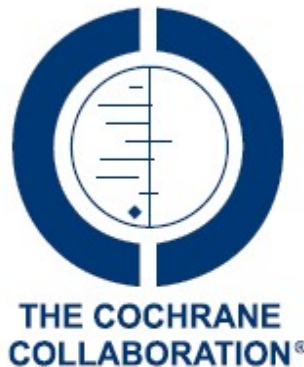

This is a reprint of a Cochrane review, prepared and maintained by The Cochrane Collaboration and published in *The Cochrane Library* 2011, Issue 1

<http://www.thecochranelibrary.com>

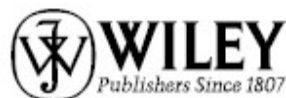

blinding gave two trials (Chao 2008; Little 2005a) which blinded the outcome assessor to give an odds ratio for these two trials of 1.42 (95% CI 0.92 to 2.19). The one completely unblinded trial (Little 1997) gave an odds ratio of 1.49 (95% CI 0.70 to 3.19). In the *delayed* antibiotic arm 413 of participants were satisfied or very satisfied out of 473 participants (87.3%) compared to 387 out of 465 participants in the *no* antibiotics group (83.2%).

Delayed antibiotics for respiratory infections (Review)

Copyright © 2011 The Cochrane Collaboration. Published by John Wiley & Sons, Ltd.

14

benefit over *delayed* antibiotics in participants with sore throat and AOM. All strategies appear to have similar safety with no advantage found for *delayed* antibiotics over *no* antibiotics for disease complications. *Delay and no* antibiotic strategies dramatically reduce the use of antibiotics for ARTIs compared to *immediate* antibiotics. The least antibiotic use was in the *no* antibiotic group followed by *delay* and then *immediate*. The number needed to treat to prevent one antibiotic prescription using the *delay* strategy is 1.6 compared to *immediate* antibiotics. The number needed to treat to prevent one antibiotic prescription using a *no* antibiotic strategy compared to *delay* is 5.6. Patient satisfaction was highest in the *immediate* antibiotic group with 92.2% being satisfied or very satisfied with the consultation. The *delay* and *no* groups had similar quite high satisfaction rates at 87.3% and 83.2%, respectively.

Overall completeness and applicability of evidence

## DISCUSSION

### Summary of main results

Small differences were found between prescribing strategies for clinical outcomes with *immediate* antibiotics most likely to show

Dowell 2001; Little 2005a; Spiro 2006), the outcomes assessor was blinded but not the patient nor the care giver. Otherwise, studies were well reported and appeared to be high quality.

### Potential biases in the review process

Heterogeneity of RCTs is the main limitation of this review. Heterogeneity may have resulted from variable clinical presentations, differences in delay method, differences in antibiotic use and quality of included studies. Type I error is a concern when interpreting the results of this review, given the heterogeneity of results with multiple outcome measures. This is especially concerning for the comparisons for clinical outcomes between *delayed* and *immediate* antibiotic groups.

Agreements and disagreements with other



Importance

Consumption-resistance

Europe-Spain

Primary Care

SOLUTION

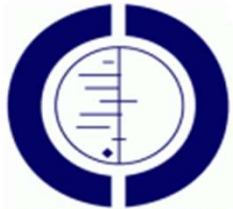

THE COCHRANE  
COLLABORATION®

## Delayed antibiotics for respiratory infections (Review)

Spurling GKP, Del Mar CB, Dooley L, Foxlee R

|                             | EFFECTIVENESS | SECURITY                                                   |
|-----------------------------|---------------|------------------------------------------------------------|
| DEFERRED<br>Vs<br>IMMEDIATE | ≈             | Increase in RAM <sup>M.N1</sup><br>Increase in resistances |

## Diapositiva 25

---

**M.N1**

a qué corresponde RAM?

MALLAH ... NARMEEN; 06/10/2020

# Current Situation

Importance

Consumption-resistance

Europe-Spain

Primary Care

SOLUTION

Patient pressure

Communication skills  
Deferred Prescription  
Supporting material



Fear / Uncertainty

Deferred Prescription

| D  | L  | M  | M  | J  | V  | S  |
|----|----|----|----|----|----|----|
|    |    |    |    |    | 1  | 2  |
| 3  | 4  | 5  | 6  | 7  | 8  | 9  |
| 10 | 11 | 12 | 13 | 14 | 15 | 16 |
| 17 | 18 | 19 | 20 | 21 | 22 | 23 |
| 24 | 25 | 26 | 27 | 28 | 29 | 30 |

Adherence to clinical guidelines

Online course

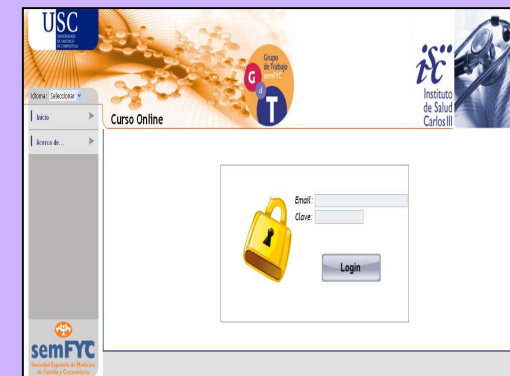

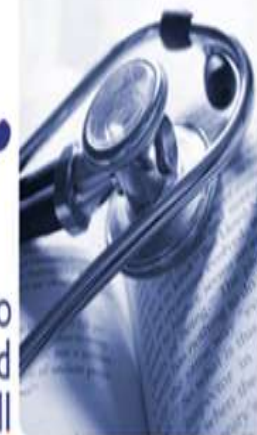

Idioma:

Presentación

Información  
General

Metodología

Manual del usuario

Sistema de Evaluación

Casos Clínicos

Algoritmos

Bibliografía de  
apoyo

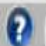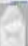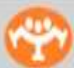

**semFYC**

Sociedad Española de Medicina  
de Familia y Comunitaria

## Sistema de Evaluación

### Sistema de Evaluación

---

El curso está dividido en 5 casos clínicos que servirán de introducción a los conceptos teóricos. Se realizará una prueba de evaluación al final con preguntas tipo test, en la que el alumno tendrá la oportunidad de valorar su evolución contrastando sus propias respuestas antes y después de realizar los casos.

#### Requerimientos exigidos para la acreditación

Haber superado en la prueba de evaluación final el 50 % de aciertos.

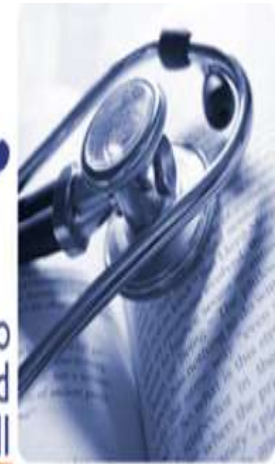

Idioma: Seleccionar

Inicio

Acerca de...

## Curso Online

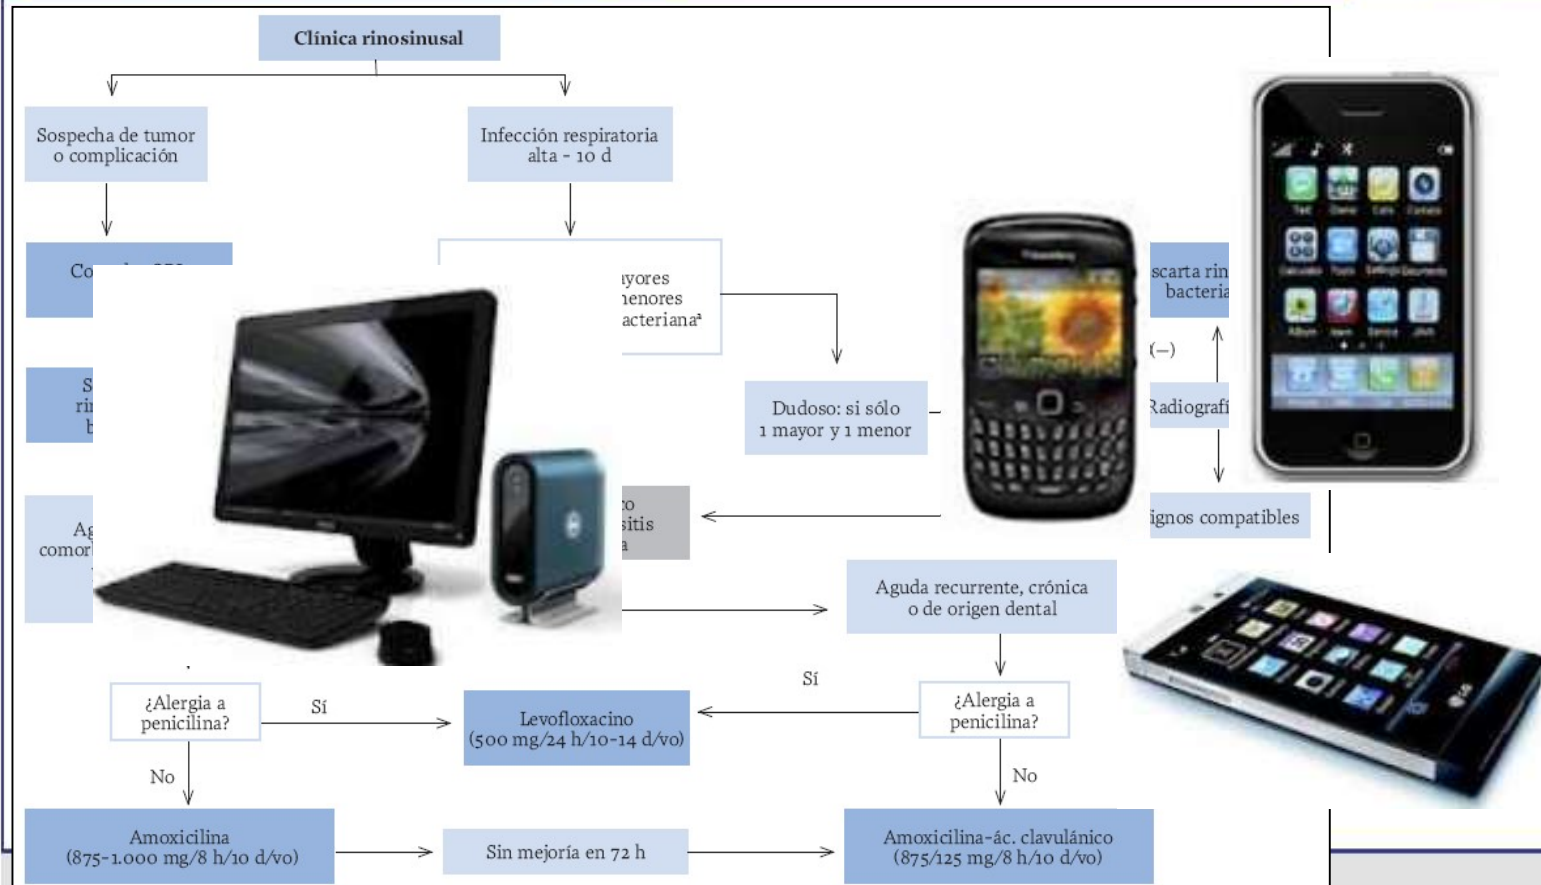

Sistema experto

# Situación Actual

Importancia

Consumo-resistencias

Europa-España

At. Primaria

SOLUCIONES

Presión del paciente

Habilidades de comunicación  
Prescripción Diferida  
Materiales de apoyo

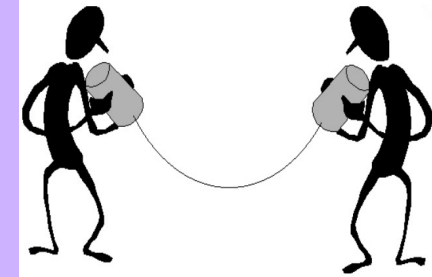

Miedo / Incertidumbre

Prescripción Diferida

| D  | L  | M  | M  | J  | V  | S  |
|----|----|----|----|----|----|----|
|    |    |    |    |    | 1  | 2  |
| 3  | 4  | 5  | 6  | 7  | 8  | 9  |
| 10 | 11 | 12 | 13 | 14 | 15 | 16 |
| 17 | 18 | 19 | 20 | 21 | 22 | 23 |
| 24 | 25 | 26 | 27 | 28 | 29 | 30 |

Adherencia a guías  
clínicas

Curso online

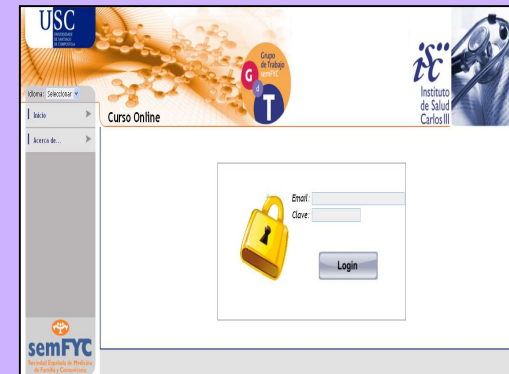

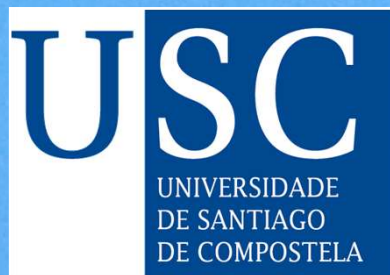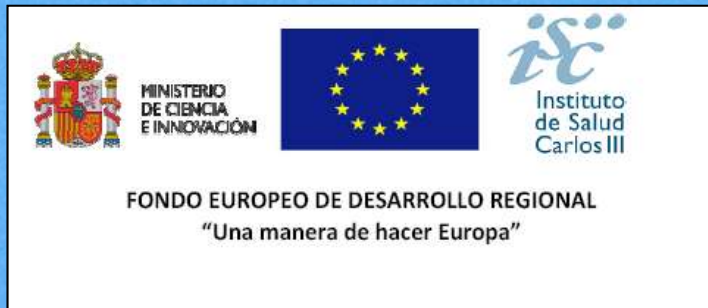

**MUCHAS GRACIAS POR SU ATENCIÓN**

**[cristian.gonzalez@usc.es](mailto:cristian.gonzalez@usc.es)**
