# Supplementary material for: Impact of a multifaceted intervention to improve antibiotic prescribing: a pragmatic cluster-randomised controlled trial
Source: Antimicrob Resist Infect Control. 2020 Dec 7;9:195. doi: 10.1186/s13756-020-00857-9 (PMC7722452; doi:10.1186/s13756-020-00857-9)
Supplement: Supplementary file 3 — Additional file 3. Supplementary intervention. [file 13756_2020_857_MOESM3_ESM.pdf]

## Appendix 3 – Supplementary Intervention

**Supplementary Figure 1.** Timeline of each of the activities included in the multifaceted intervention.

| Year<br>Month           | 2011 |    | 2012 |   |   |   |   |   |   |   |   |    |    |    | 2013 |   |   |   |   |   |   |   |   |    |    |    | 2014 |   |   |   |   |   |   |
|-------------------------|------|----|------|---|---|---|---|---|---|---|---|----|----|----|------|---|---|---|---|---|---|---|---|----|----|----|------|---|---|---|---|---|---|
|                         | 11   | 12 | 1    | 2 | 3 | 4 | 5 | 6 | 7 | 8 | 9 | 10 | 11 | 12 | 1    | 2 | 3 | 4 | 5 | 6 | 7 | 8 | 9 | 10 | 11 | 12 | 1    | 2 | 3 | 4 | 5 | 6 | 7 |
| Outreach Visit          |      |    |      |   |   |   |   |   |   |   |   |    |    |    |      |   |   |   |   |   |   |   |   |    |    |    |      |   |   |   |   |   |   |
| On-line Course          |      |    |      |   |   |   |   |   |   |   |   |    |    |    |      |   |   |   |   |   |   |   |   |    |    |    |      |   |   |   |   |   |   |
| 1 <sup>st</sup> edition |      |    |      |   |   |   |   |   |   |   |   |    |    |    |      |   |   |   |   |   |   |   |   |    |    |    |      |   |   |   |   |   |   |
| 2 <sup>nd</sup> edition |      |    |      |   |   |   |   |   |   |   |   |    |    |    |      |   |   |   |   |   |   |   |   |    |    |    |      |   |   |   |   |   |   |
| 3 <sup>rd</sup> edition |      |    |      |   |   |   |   |   |   |   |   |    |    |    |      |   |   |   |   |   |   |   |   |    |    |    |      |   |   |   |   |   |   |
| CDSS                    |      |    |      |   |   |   |   |   |   |   |   |    |    |    |      |   |   |   |   |   |   |   |   |    |    |    |      |   |   |   |   |   |   |
| e-mail reminder         |      |    |      |   |   |   |   |   |   |   |   |    |    |    |      |   |   |   |   |   |   |   |   |    |    |    |      |   |   |   |   |   |   |

Abbreviations. CDSS; Clinical decision support system.
